# Supplementary material for: Photocatalytic CO2 reduction with iron porphyrin catalysts and anthraquinone dyes
Source: Royal Society of Chemistry journal article supplement (doi:10.1039/d4cc01950d), 2024-01-01
Supplement: d4cc01950d1.pdf [file d4cc01950d1.pdf]

## Supporting information

### **Photocatalytic CO<sub>2</sub> reduction with iron porphyrin catalysts and anthraquinone dyes**

Huiqing Yuan,<sup>\*a,b</sup> Yuanhai Yu,<sup>b</sup> Shuang Yang,<sup>b</sup> Qinqin Lei,<sup>b</sup> Zhiwei Yang,<sup>b</sup> Bang Lan,<sup>\*a</sup>  
and Zhiji Han<sup>\*b</sup>

<sup>a</sup> School of Chemistry and Environment, Jiaying University, Meizhou, Guangdong  
514015, China. E-mail: yuanhq3@mail2.sysu.edu.cn; jyulb6@163.com

<sup>b</sup> MOE Key Laboratory of Bioinorganic and Synthetic Chemistry, School of Chemistry,  
Sun Yat-sen University, Guangzhou 510275, China. hanzhiji@mail.sysu.edu.cn

## Table of Contents

|                                                                                                        |        |
|--------------------------------------------------------------------------------------------------------|--------|
| General Consideration                                                                                  | S3     |
| Synthesis of <b>Fe1/Fe2/Fe3</b>                                                                        | S3-7   |
| Physical Methods                                                                                       | S8-9   |
| Figure S1-4 <sup>1</sup> H NMR spectra of porphyrin                                                    | S10-11 |
| Figure S5-6 <sup>1</sup> H NMR spectra of <b>PS1</b> and <b>PS2</b>                                    | S12    |
| Figure S7-8 HPMS spectra of porphyrin                                                                  | S13-14 |
| Figure S9-11 UV-vis spectra of catalyst                                                                | S15    |
| Figure S12 CV of <b>Fe1/Fe2/Fe3</b> under CO <sub>2</sub>                                              | S16    |
| Figure S13-14 UV-vis spectra of photosensitizer                                                        | S17    |
| Figure S15-18 Emission and excitation spectra of <b>PS1</b> and <b>PS2</b>                             | S18-19 |
| Figure S19 CV of <b>PS1</b> and <b>PS2</b>                                                             | S20    |
| Figure S20 Photocatalytic CO <sub>2</sub> reduction with varying [ <b>PS1</b> ]                        | S20    |
| Figure S21 Photocatalytic CO <sub>2</sub> reduction with varying [BIH]                                 | S21    |
| Figure S22 Photocatalytic CO <sub>2</sub> reduction with low concentration of <b>Fe1</b>               | S21    |
| Figure S23 Photocatalytic CO <sub>2</sub> reduction with varying [ <b>Fe1</b> ]                        | S22    |
| Figure S24 GC-MS spectrum of <sup>13</sup> CO <sub>2</sub> labeling experiments                        | S22    |
| Figure S25 Dynamic light scattering (DLS) experiments                                                  | S23    |
| Figure S26 Mercury poisoning experiments                                                               | S23    |
| Figure S27 UV-vis absorption spectra of <b>PS1</b> and <b>PS2</b> with addition of BIH                 | S24    |
| Figure S28 UV-vis absorption spectra of <b>PS1</b> and <b>PS2</b> with addition of <b>Fe1</b>          | S24    |
| Figure S29 Emission delay of <b>PS1</b>                                                                | S25    |
| Figure S30 Emission delay of <b>PS2</b>                                                                | S25    |
| Figure S31 Fluorescence lifetime quenching of <b>PS1</b>                                               | S26    |
| Figure S32 Fluorescence lifetime quenching of <b>PS2</b>                                               | S26    |
| Figure S33 UV-vis absorption spectra of <b>PS1</b> and <b>PS2</b> with addition varying [ <b>Fe1</b> ] | S27    |
| Figure S34-35 The change of UV-vis spectra of <b>PS1</b> and <b>PS2</b> during photolysis              | S27    |
| Table S1 Electrochemical properties of catalyst                                                        | S28    |
| Table S2 Electrochemical properties of <b>PS1</b> and <b>PS2</b>                                       | S28    |
| Table S3 Control experiments for photocatalytic CO <sub>2</sub> reduction for 10 h                     | S29    |
| Table S4 Summary with porphyrin complexes in noble-metal-free systems                                  | S30-31 |
| References                                                                                             | S32    |

## General Consideration

All solvents and reagents were procured from commercial sources and utilized as received. BIH was synthesized according to the methods of literature.<sup>1</sup> UV-visible absorption spectra were acquired using a Thermo Scientific GENESYS 50 UV-visible spectrophotometer. Elemental analysis was obtained at an Elementar Vario EL analyzer. Dynamic light scattering experiments were conducted with a Brookhaven Elite Sizer zeta-potential and particle size analyzer. <sup>1</sup>H NMR spectra were recorded with a Bruker advance III 400 MHz NMR instrument.

## Synthesis of 5,10,15,20-tetrakis(4'-bromo-2',6'-dimethoxyphenyl)porphyrin

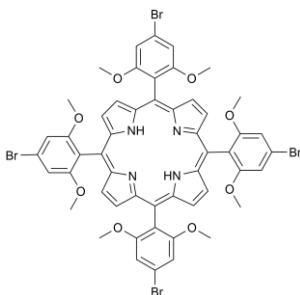

5,10,15,20-tetrakis(4'-bromo-2',6'-dimethoxyphenyl)porphyrin was synthesized following a modified literature procedure.<sup>2</sup> Initially, a mixture of 4'-bromo-2',6'-dimethoxybenzaldehyde (1.475 g, 6.02 mmol) and pyrrole (0.419 mL, 6.02 mmol) in CHCl<sub>3</sub> (600 mL) was subjected to N<sub>2</sub> degassing for a minimum of 20 minutes. Then, boron trifluoride diethyl etherate (BF<sub>3</sub>·OEt<sub>2</sub>, 0.228 mL, 0.87 mmol) was added dropwise using a syringe. The solution was stirred at ambient temperature under N<sub>2</sub> atmosphere in darkness for 1.5 hours, after which 2,3-dichloro-5,6-dicyano-1,4-benzoquinone (DDQ, 1.02 g, 4.51 mmol) was incorporated. Stirring was continued for an additional 1.5 hours at reflux. Upon cooling to room temperature, the reaction mixture was treated with triethylamine (1 mL) to neutralize any residual acidity. Subsequent removal of the solvent yielded a black solid, which was purified via column chromatography on silica gel using dichloromethane (CH<sub>2</sub>Cl<sub>2</sub>) as the eluent. The purification process resulted in the isolation of 5,10,15,20-tetrakis(4'-bromo-2',6'-dimethoxyphenyl)porphyrin as a purple powder (390 mg, 22% yield). <sup>1</sup>H NMR (400 MHz, CDCl<sub>3</sub>): δ 8.67 (s, 8H), 7.14 (s, 8H), 3.50 (s, 24H), -2.62 (s, 2H). HRMS (m/z): [M + H]<sup>+</sup> Calcd. for C<sub>52</sub>H<sub>42</sub>N<sub>4</sub>O<sub>8</sub>Br<sub>4</sub> 1170.97680; found, 1170.97688.

## Synthesis of 5,10,15,20-tetrakis(4'-bromo-2',6'- dihydroxyphenyl)porphyrin

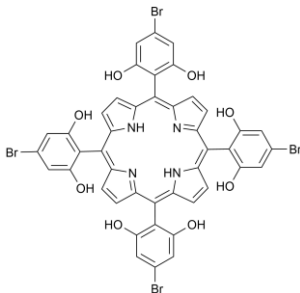

To a stirred solution of 5,10,15,20-tetrakis(4'-bromo-2',6'-dimethoxyphenyl)porphyrin (300 mg, 0.256 mmol) in anhydrous dichloromethane (20 mL), boron tribromide ( $\text{BBr}_3$ , 3.0 mL, 31.14 mmol) was added at 0 °C under a nitrogen atmosphere. The mixture, which turned green upon addition, was stirred at room temperature for 72 hours. Subsequently, water (10.0 mL) was carefully added to the reaction mixture at 0 °C, followed by stirring for an additional 40 minutes. The reaction was neutralized with saturated  $\text{NaHCO}_3$  solution until the pH of the aqueous phase reached approximately 7. Ethyl acetate (50 mL) was then introduced, and the organic layer was separated and washed with water ( $3 \times 50$  mL). After solvent evaporation, the residue underwent purification by column chromatography on silica gel, eluting with a 2:1 mixture of ethyl acetate and dichloromethane, to afford 5,10,15,20-tetrakis(4'-bromo-2',6'-dihydroxyphenyl)porphyrin as a purple powder (237 mg, 87.4% yield).  $^1\text{H NMR}$  (400 MHz,  $\text{CD}_3\text{OD}$ ):  $\delta$  8.90 (s, 8H), 6.98 (s, 8H). HRMS ( $m/z$ ):  $[\text{M} + \text{H}]^+$  Calcd. for  $\text{C}_{44}\text{H}_{26}\text{N}_4\text{O}_8\text{Br}_4$  1058.85160; found, 1058.85308.

### Synthesis of chloro iron(III) 5,10,15,20-tetrakis(4'-bromo-2',6'-dihydroxyphenyl)porphyrin (Fe1)

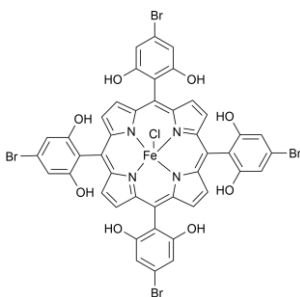

**Fe1** was synthesized by combining 5,10,15,20-tetrakis(4'-bromo-2',6'-dihydroxyphenyl)porphyrin (200 mg, 0.189 mmol), and iron(II) chloride tetrahydrate ( $\text{FeCl}_2 \cdot 4\text{H}_2\text{O}$ , 540 mg, 2.7 mmol) in anhydrous methanol. The reaction mixture was heated at 50 °C for 48 hours under a nitrogen atmosphere. Following solvent removal, the resultant brown solid was dissolved in ethyl acetate (50 mL) and treated with 1.2 M  $\text{HCl}$  (50 mL), stirred for 4 hours. The organic layer was separated and washed with saturated  $\text{NaCl}$  solution until a neutral pH was achieved. Following the removal of the organic solvent through rotary evaporation, the crude product was subjected to purification by column chromatography on silica gel, using ethyl acetate as the eluent, to yield **Fe1** as a brown

solid. Subsequently, **Fe1** was dissolved in ethyl acetate, and the crystallization was induced through the slow diffusion of petroleum ether as the top layer, leading to the formation of plate-like rectangular single crystals. However, the quality of the crystals was poor, making them unsuitable for measurement. After collecting the single crystals, they were redissolved in ethyl acetate (50 mL), with the addition of 50 mL of 1.2 M HCl, and the mixture was stirred continuously for one day. Following the completion of the reaction, the solvent was evaporated under reduced pressure, and the resultant product was dried in a vacuum (130 mg, 60% yield). HRMS (m/z): [M-Cl]<sup>+</sup> Calcd. for C<sub>44</sub>H<sub>24</sub>FeN<sub>4</sub>O<sub>8</sub> 1111.76306; found, 1111.76404. Elemental analysis Calcd. for C<sub>52</sub>H<sub>46</sub>Br<sub>4</sub>ClFeN<sub>4</sub>O<sub>15</sub> (**Fe1**·3H<sub>2</sub>O·2EA): C, 45.33%; H, 3.37%; N, 4.07%. Found: C, 45.02%; H, 3.41%; N, 4.36%.

### Synthesis of 5,10,15,20-tetrakis(2',6'-dimethoxy-4'-methylphenyl)porphyrin

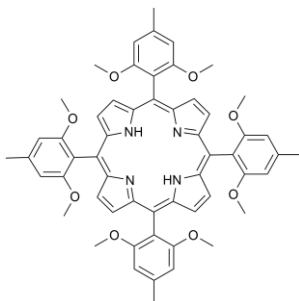

5,10,15,20-tetrakis(2',6'-dimethoxy-4'-methylphenyl)porphyrin was synthesized following a modified literature procedure.<sup>2</sup> Initially, a mixture of 2,6-dimethoxy-4-methylbenzaldehyde (1.084 g, 6.02 mmol) and pyrrole (0.419 mL, 6.02 mmol) in chloroform (600 mL) was subjected to N<sub>2</sub> degassing for a minimum of 20 minutes. Then, boron trifluoride diethyl etherate (BF<sub>3</sub>·OEt<sub>2</sub>, 0.228 mL, 0.87 mmol) was added dropwise using a syringe. The solution was stirred at ambient temperature under N<sub>2</sub> atmosphere in darkness for 1.5 hours, after which 2,3-dichloro-5,6-dicyano-1,4-benzoquinone (DDQ, 1.02 g, 4.51 mmol) was incorporated. Stirring was continued for an additional 1.5 hours at reflux. Upon cooling to room temperature, the reaction mixture was treated with triethylamine (1 mL) to neutralize any residual acidity. Subsequent removal of the solvent yielded a black solid, which was purified via column chromatography on silica gel using dichloromethane as the eluent. The purification process resulted in the isolation of 5,10,15,20-tetrakis(2',6'-dimethoxy-4'-methylphenyl)porphyrin as a purple powder (180 mg, 13% yield). <sup>1</sup>H NMR (400 MHz, CDCl<sub>3</sub>): δ 8.67 (s, 8H), 6.79 (s, 8H), 3.47 (s, 24H), 2.68 (s, 12H), -2.51 (s, 2H). HRMS (m/z): [M + H]<sup>+</sup> Calcd. for C<sub>56</sub>H<sub>54</sub>N<sub>4</sub>O<sub>8</sub> 911.40144; found, 911.40090.

### Synthesis of 5,10,15,20-tetrakis(2',6'-dihydroxy-4'-methylphenyl)porphyrin

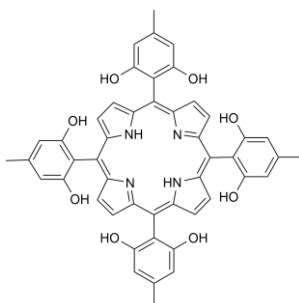

To a stirred solution of 5,10,15,20-tetrakis(2',6'-dimethoxy-4'-methylphenyl)porphyrin (100 mg, 0.11 mmol) in anhydrous dichloromethane (20 mL), boron tribromide ( $\text{BBr}_3$ , 2.0 mL, 20.76 mmol) was added at 0 °C under a  $\text{N}_2$  atmosphere. The mixture, which turned green upon addition, was stirred at room temperature for 72 hours. Subsequently, water (10.0 mL) was carefully added to the reaction mixture at 0 °C, followed by stirring for an additional 40 minutes. The reaction was neutralized with saturated  $\text{NaHCO}_3$  solution until the pH of the aqueous phase reached approximately 7. Ethyl acetate (50 mL) was then introduced, and the organic layer was separated and washed with water ( $3 \times 50$  mL). After solvent evaporation, the residue underwent purification by column chromatography on silica gel, eluting with a 2:1 mixture of ethyl acetate and dichloromethane, to afford 5,10,15,20-tetrakis(2',6'-dihydroxy-4'-methylphenyl)porphyrin as a purple powder (75 mg, 85% yield).  $^1\text{H NMR}$  (400 MHz,  $\text{CD}_3\text{OD}$ ):  $\delta$  8.89 (s, 8H), 6.65 (s, 8H), 2.54 (s, 12H). HRMS ( $m/z$ ):  $[\text{M} + \text{H}]^+$  calcd for  $\text{C}_{48}\text{H}_{38}\text{N}_4\text{O}_8$  799.27624; found, 799.27672.

### Synthesis of chloro iron(III) 5,10,15,20-tetrakis(2',6'-dihydroxy-4'-methylphenyl)porphyrin (**Fe3**)

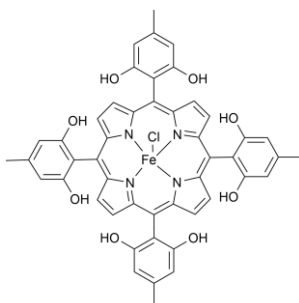

**Fe3** was synthesized by combining 5,10,15,20-tetrakis(2',6'-dihydroxy-4'-methylphenyl)porphyrin (50 mg, 0.063 mmol), and  $\text{FeCl}_2 \cdot 4\text{H}_2\text{O}$  (180 mg, 0.9 mmol) in anhydrous methanol. The reaction mixture was heated at 50 °C for 48 hours under a nitrogen atmosphere. Following solvent removal, the resultant brown solid was dissolved in ethyl acetate (30 mL) and treated with 1.2 M  $\text{HCl}$  (30 mL), stirred for 4 hours. The organic layer was separated and washed with saturated  $\text{NaCl}$  solution until a neutral pH was achieved. Following the removal of the organic solvent through rotary evaporation, the crude product was subjected to purification by column chromatography on silica gel, using ethyl acetate as the eluent, to yield **Fe3** as a brown solid. Subsequently, **Fe3** was dissolved in ethyl

acetate, and the crystallization was induced through the slow diffusion of petroleum ether as the top layer. However, the resulting crystals were too small to allow for single-crystal analysis. Subsequently, the fine crystals were collected and dissolved in ethyl acetate (30 mL). with the addition of 30 mL of 1.2 M HCl, and the mixture was stirred continuously for one day. Following the completion of the reaction, the solvent was evaporated under reduced pressure, and the resultant product was dried in a vacuum (45 mg, 80% yield). HRMS (m/z):  $[M-Cl]^+$  calcd for  $C_{44}H_{24}FeN_4O_8$  852.18771; found, 852.18781. Elemental analysis Calcd. for  $C_{66}H_{76}ClFeN_4O_{15}$  (**Fe3**·H<sub>2</sub>O·3EA·C<sub>6</sub>H<sub>14</sub>): C, 63.08%; H, 6.01%; N, 4.46%. Found: C, 63.16%; H, 6.42%; N, 4.18%.

### Synthesis of chloro iron(III) 5,10,15,20-tetrakis(2',6'-dihydroxy)porphyrin (**Fe2**)

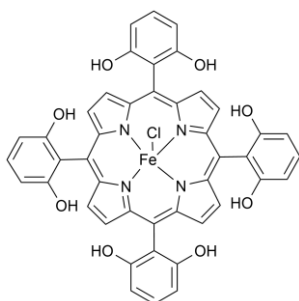

The synthesis of **Fe2** was conducted based on previously reported literature, with modifications to the original procedure.<sup>2</sup> The purified **Fe2** was dissolved in ethyl acetate, followed by an attempt at recrystallization through slow diffusion with petroleum ether as the overlaying solvent. Unfortunately, this process did not yield any crystals. Consequently, the resulting powder was collected and redissolved in ethyl acetate (30 mL). Subsequently, 1.2 M HCl (30 mL) was added to the solution, which was stirred continuously for one day. After the reaction was completed, the solvent was removed under reduced pressure by rotary evaporation, and the product was dried under vacuum. Elemental analysis Calcd. for  $C_{56}H_{62}ClFeN_4O_{19}$  (**Fe2**·5H<sub>2</sub>O·3EA): C, 61.42%; H, 5.71%; N, 5.12%. Found: C, 61.47%; H, 5.57%; N, 5.49%.

**Photocatalytic CO<sub>2</sub> Reduction.** Photocatalytic reactions were performed in sealed glass vials (headspace: 51.8 mL) equipped with rubber stoppers and subjected to magnetic stirring. The reaction mixture (5.0 mL) was purged with carbon dioxide (CO<sub>2</sub>) for 25 minutes before exposure to blue LED illumination ( $\lambda = 450$  nm, PCX-50C, Beijing Perfectlight Technology Co., Ltd. Please refer to our previous report for the emission spectrum of the blue LED light source<sup>3</sup>). Gaseous products were quantitatively analyzed using a Shimadzu GC-2014 gas chromatograph, which was fitted with Shimadzu Molecular Sieve 13X 80/100 (3.2 mm  $\times$  2.1 mm  $\times$  3.0 m) and Porapak N (3.2 mm  $\times$  2.1 mm  $\times$  2.0 m) columns. Detection of H<sub>2</sub> was facilitated by a thermal conductivity detector (TCD), while CO and other hydrocarbons were detected using a flame ionization detector

(FID) coupled with a methanizer. Nitrogen served as the carrier gas. The chromatographic oven was maintained at 60 °C, with the TCD detector and injection port temperatures held at 100 °C and 200 °C, respectively.

**Cyclic Voltammetry.** Cyclic voltammetry (CV) experiments were conducted using a CHI-760E electrochemical workstation within a single-compartment cell equipped with a glassy carbon electrode (3 mm diameter) as the working electrode, a platinum auxiliary electrode, and a saturated calomel electrode (SCE) as the reference electrode. The electrolyte consisted of 0.1 M tetrabutylammonium hexafluorophosphate dissolved in DMF. Prior to measurements, solutions were subjected to N<sub>2</sub> or CO<sub>2</sub> purging for 30 minutes to ensure deoxygenation. All potentials reported herein are referenced to the SCE.

**Fluorescence Quenching.** A solution containing the designated photosensitizer was degassed by nitrogen for 15 minutes in a hermetically sealed quartz cuvette with a septum cap. After the degassing process, BIH was introduced into the nitrogen-saturated solution of the photosensitizer. The lifetimes of **PS1** and **PS2** at 472 nm were determined using a laser spectroscopy instrument (FLS 980, Edinburgh Instruments). The quenching rate constant ( $k_q$ ) was calculated by the Stern-Volmer equation (1):

$$I_0/I \text{ or } \tau_0/\tau = 1 + k_q \times \tau_0 \times [Q] \quad (1)$$

where  $I_0$  and  $I$  represent the fluorescence intensity of the photosensitizer in the absence and presence quencher,  $k_q$  is the quenching rate constant;  $\tau_0$  and  $\tau$  is the lifetime of the photosensitizer in the absence and presence of the quencher,  $[Q]$  is the concentration of quencher.

**Quantum Yield Measurement.** The differential light absorption by photosensitizer was determined by comparing the power of light transmitted through a control solution (containing catalyst and BIH) with that through the test sample (containing photosensitizer, catalyst, and BIH). The average irradiance,  $P$  (W/cm<sup>2</sup>), was quantified using a FZ-A Power meter from Beijing Normal University Optical Instrument Co. Blue monochromatic light at 450 nm was generated by a LED light source (model PCX-50C, Beijing Perfectlight Technology Co., Ltd.). The quantum yield for the photocatalytic reduction of CO<sub>2</sub> to CO, following exposure to 450 nm light, was calculated employing the subsequent equation:

$$\Phi_{CO} = \frac{2 \times \text{number of the CO molecules}}{\text{number of incident photons}} \times 100\% \quad (2)$$

that is,

$$\Phi_{CO} = \frac{2 \times n(CO)}{I} \times 100\% \quad (3)$$



where  $n(\text{CO})$  is the number of molecules of CO produced,  $I$  is the number of incident photons; the calculation formula of the incident photon number  $I$  is as follows:

$$I = PSt \frac{\lambda}{hc} \quad (4)$$

where  $S$  is the incident irradiation area ( $S = 6.33 \text{ cm}^2$ ),  $t$  is the irradiation time,  $\lambda$  is the incident wavelength,  $h$  is the Plank constant ( $6.626 \times 10^{-34} \text{ J}\cdot\text{s}$ ),  $c$  is the speed of light ( $3 \times 10^8 \text{ m s}^{-1}$ ).

$$\Phi = \frac{2 \times n(\text{CO}) \times N_A}{PSt \times \frac{\lambda}{hc}} \times 100\% \quad (5)$$

where  $N_A$  is the Avogadro constant ( $6.02 \times 10^{23} \text{ mol}^{-1}$ ).

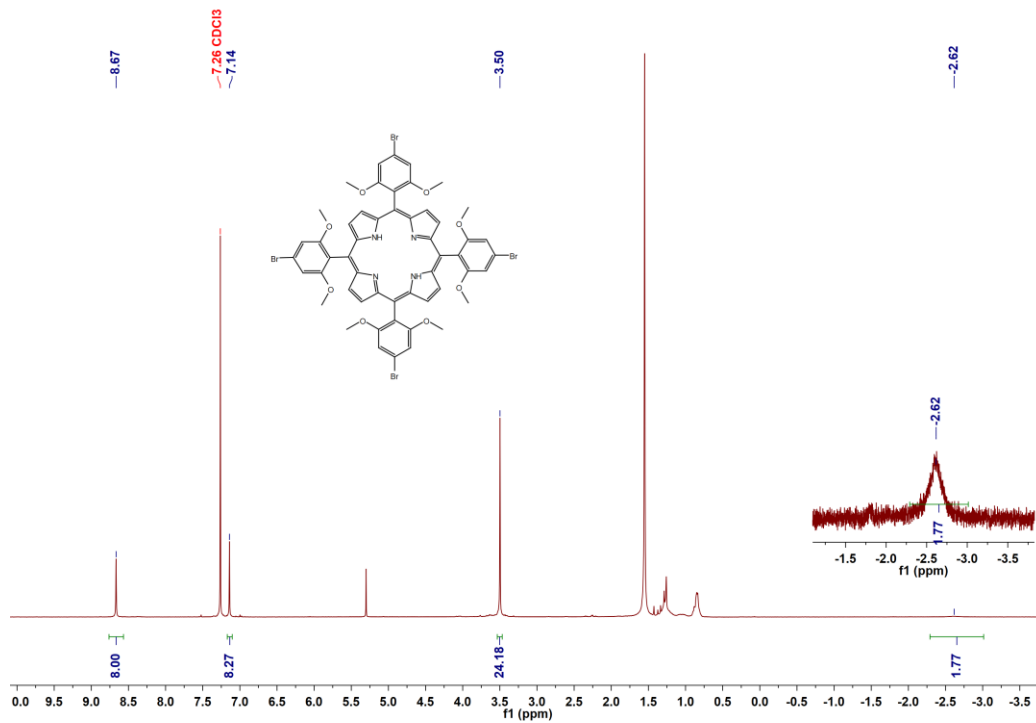

Fig. S1 <sup>1</sup>H NMR spectrum of 5, 10, 15, 20-tetrakis(4'-bromo-2',6'-dimethoxyphenyl)-21H,23H-porphyrin in CDCl<sub>3</sub>.

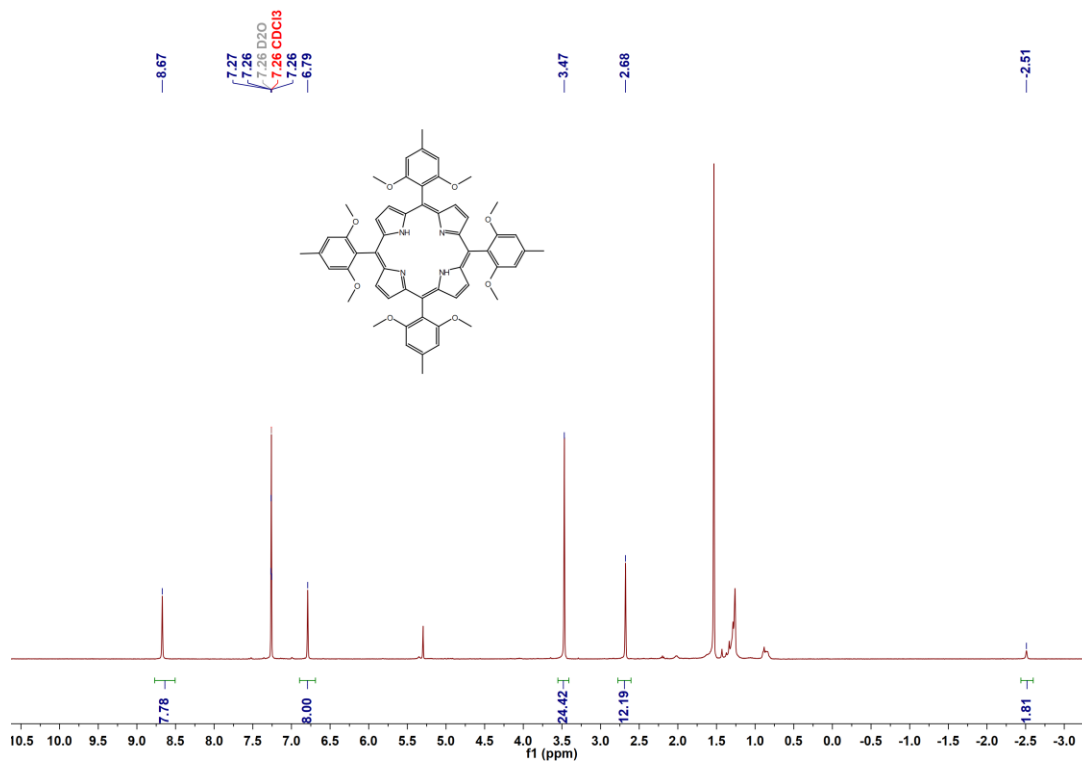

Fig. S2 <sup>1</sup>H NMR spectrum of 5, 10, 15, 20-tetrakis(2',6'-dimethoxy-4'-methylphenyl)-21H,23H-porphyrin in CDCl<sub>3</sub>.

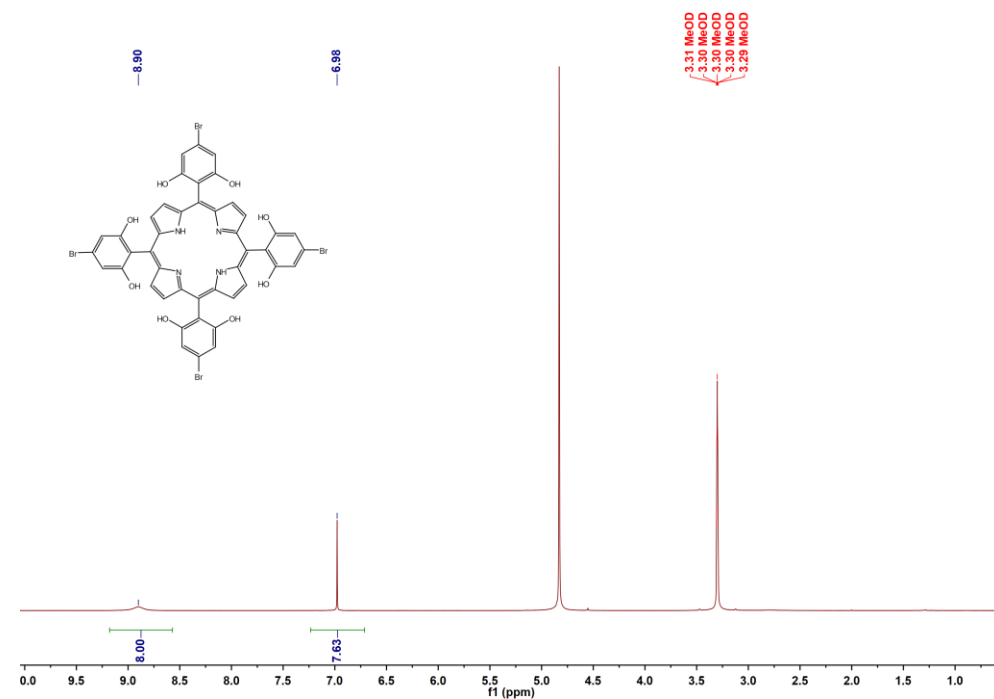

Fig. S3  $^1\text{H}$  NMR spectrum of 5, 10, 15, 20-tetrakis(4'-bromo-2',6'-dihydroxyphenyl)-21H,23H-porphyrin in  $\text{CD}_3\text{OD}$ .

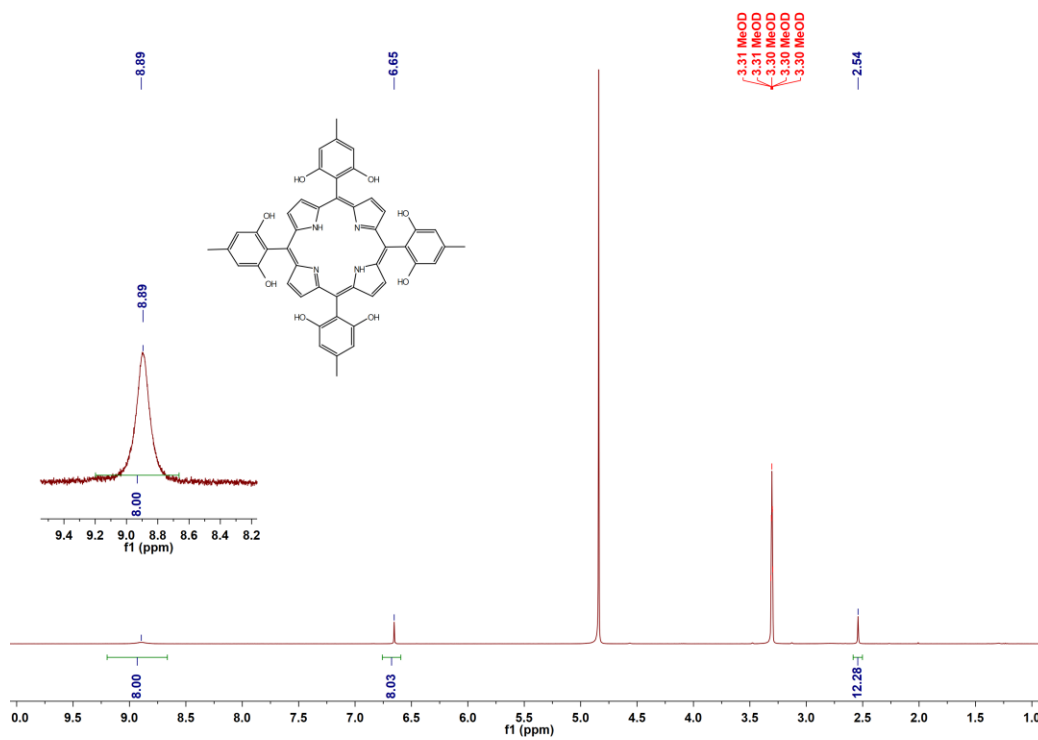

Fig. S4  $^1\text{H}$  NMR spectrum of 5, 10, 15, 20-tetrakis(2',6'-dihydroxy-4'-methylphenyl)-21H,23H-porphyrin in  $\text{CD}_3\text{OD}$ .

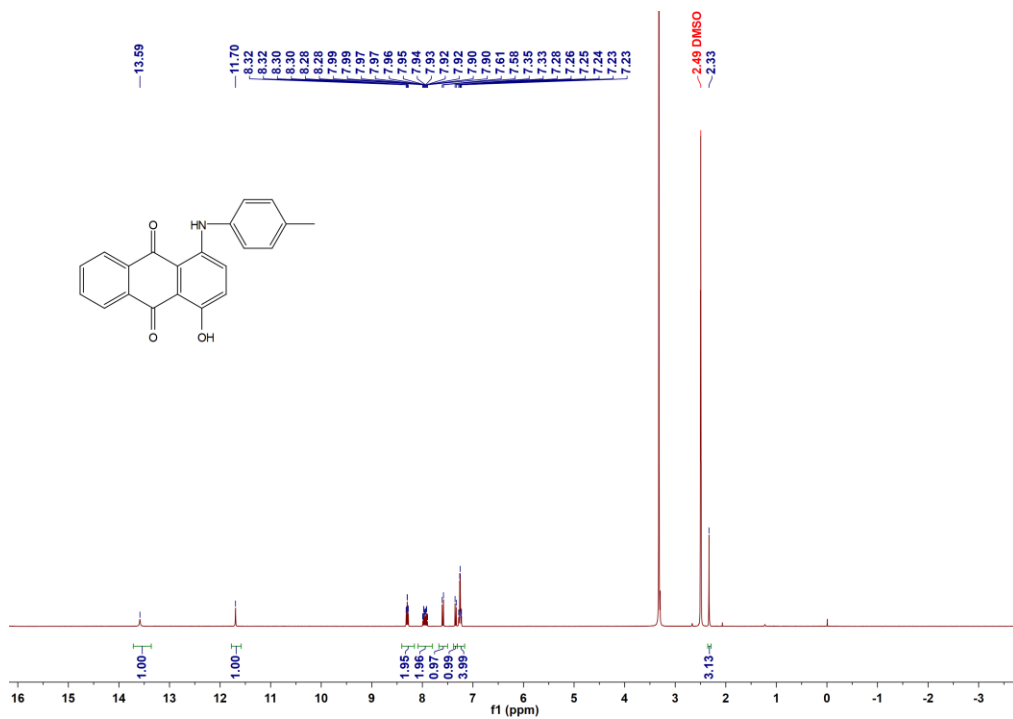

Fig. S5 <sup>1</sup>H NMR spectrum of PS1 in DMSO-d<sub>6</sub>.

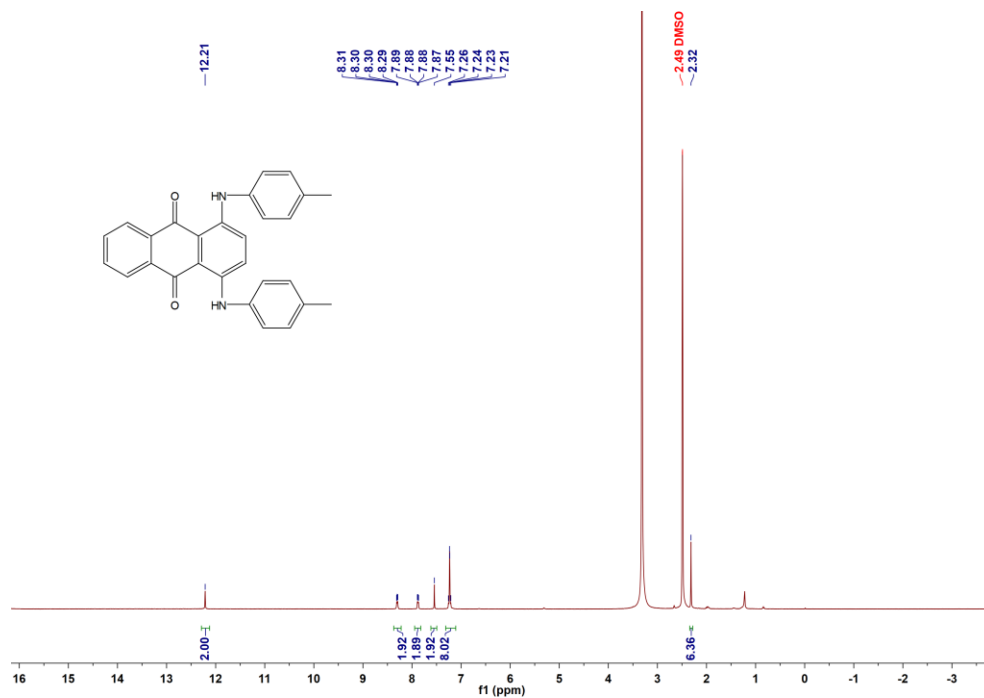

Fig. S6 <sup>1</sup>H NMR spectrum of PS2 in DMSO-d<sub>6</sub>.

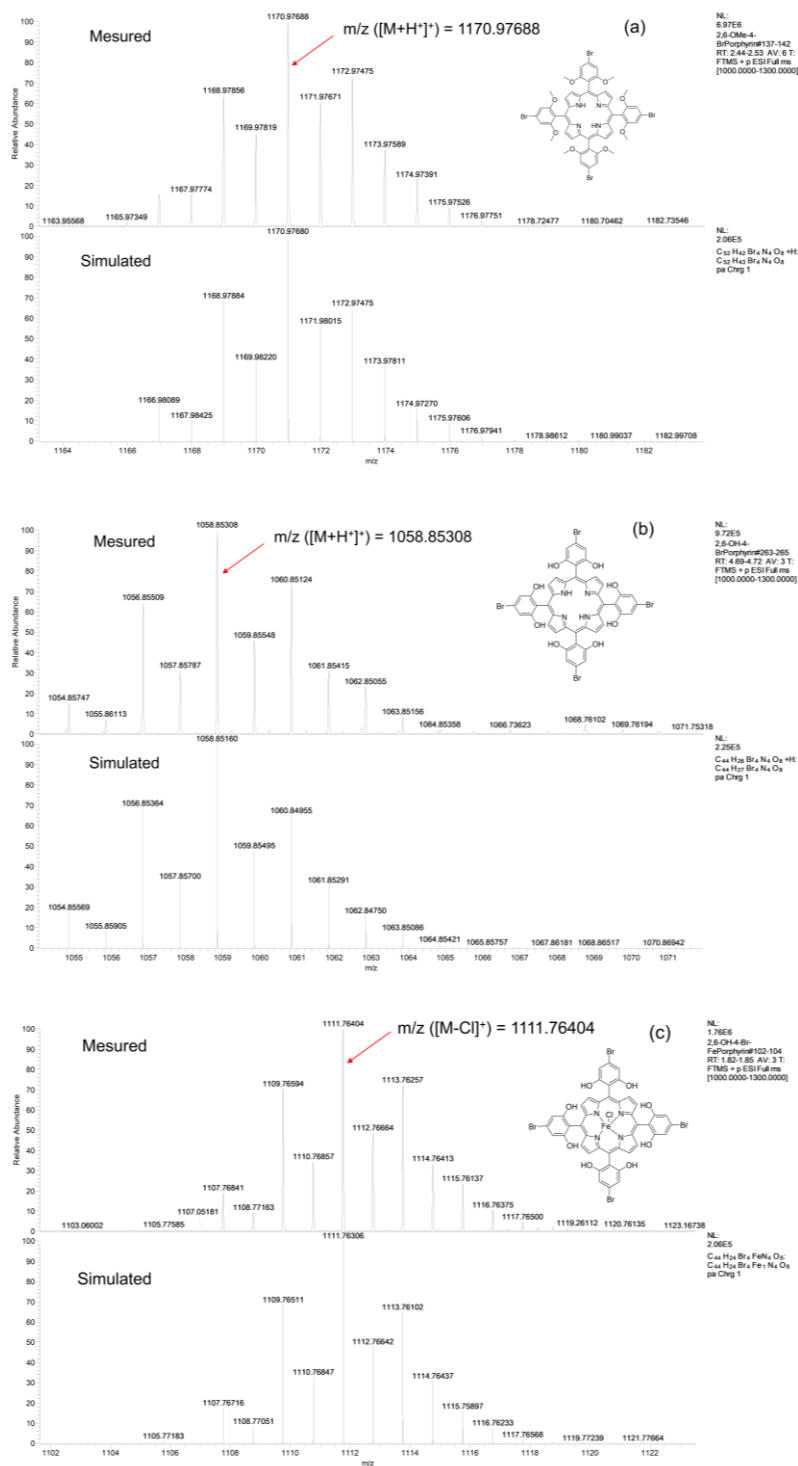

**Fig. S7** HRMS spectra of 5, 10, 15, 20-tetrakis(4'-bromo-2',6'-dimethoxyphenyl)porphyrin (a); 10, 15, 20-tetrakis(4'-bromo-2',6'-dihydroxyphenyl)porphyrin (b); and chloro iron (III) 5, 10, 15, 20-tetrakis(4'-bromo-2',6'-dihydroxyphenyl) porphyrin (**Fe1**) (c) in CH<sub>3</sub>OH(positive ion mode).

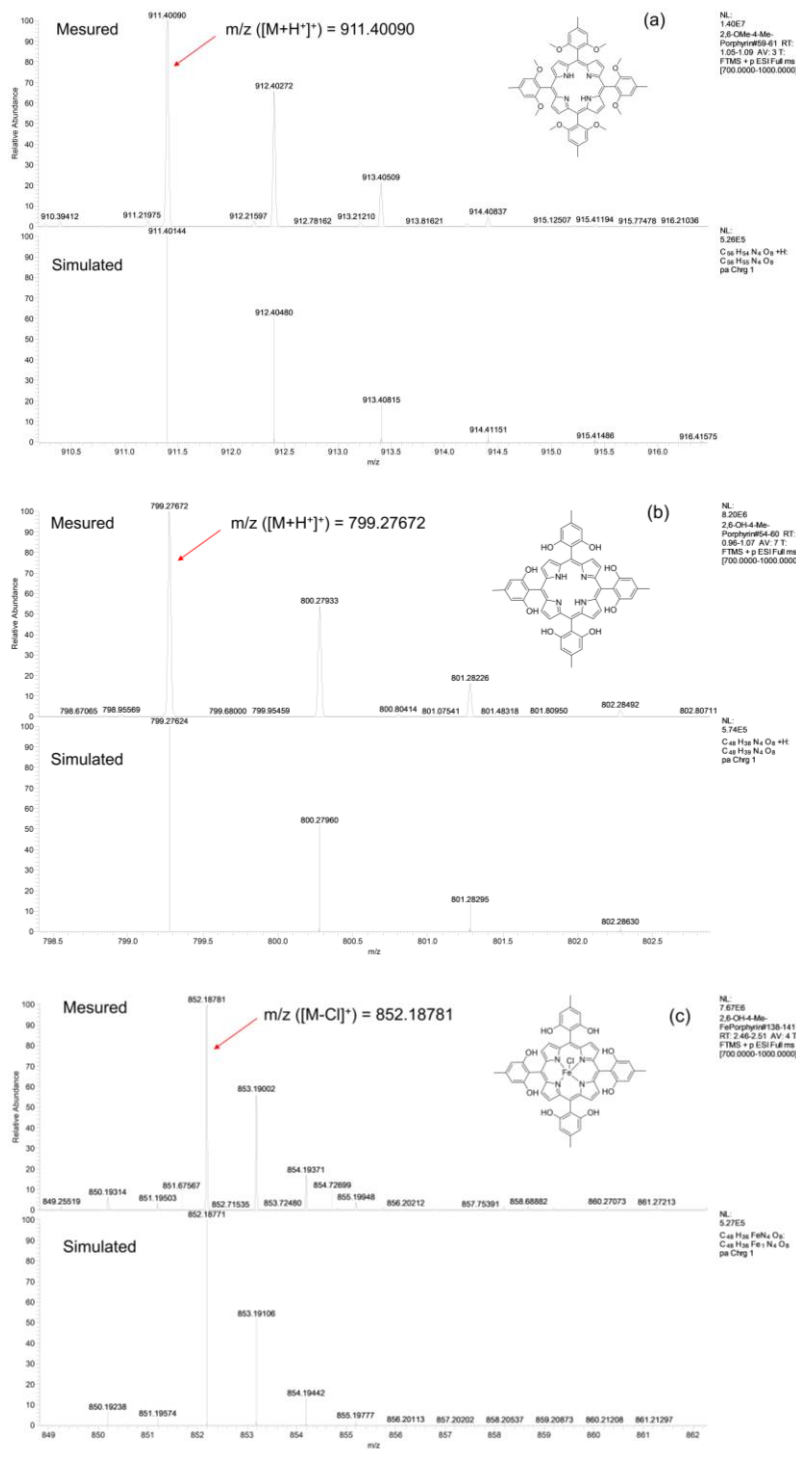

**Fig. S8** HRMS spectra of 5, 10, 15, 20-tetrakis(2',6'-dimethoxy-4'-methylphenyl)porphyrin (a); 5, 10, 15, 20-tetrakis(2',6'-dihydroxy-4'-methylphenyl)porphyrin (b); and chloro iron (III) 5, 10, 15, 20-tetrakis(2',6'-dihydroxy-4'-methylphenyl)porphyrin (**Fe3**) (c) in CH<sub>3</sub>OH (positive ion mode).

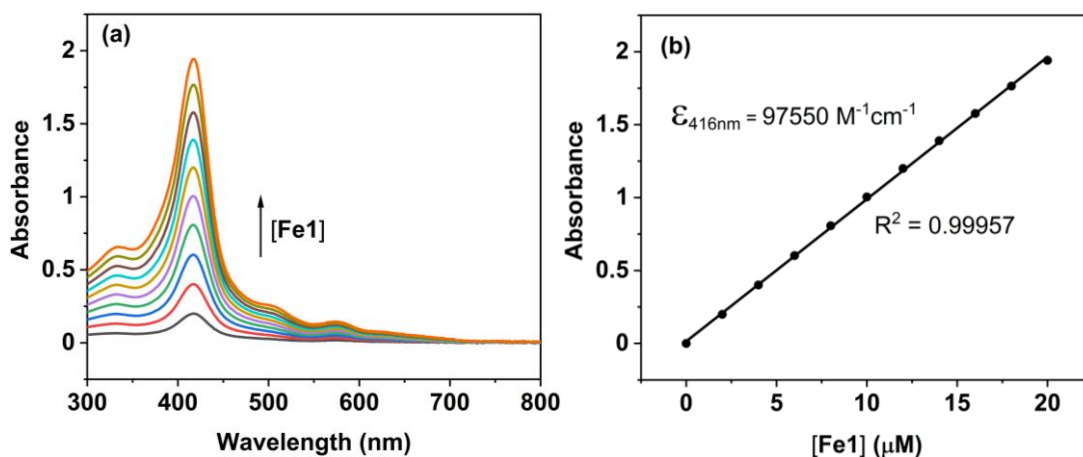

**Fig. S9** (a) UV-vis absorption spectra of **Fe1** in DMF at different concentrations. (b) Linear plots of absorbance at 416 nm.

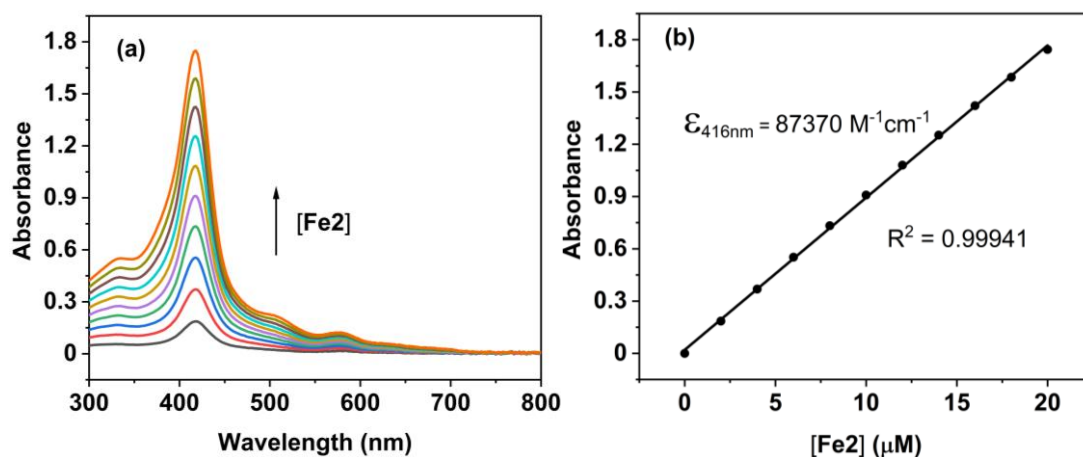

**Fig. S10** (a) UV-vis absorption spectra of **Fe2** in DMF at different concentrations. (b) Linear plots of absorbance at 416 nm.

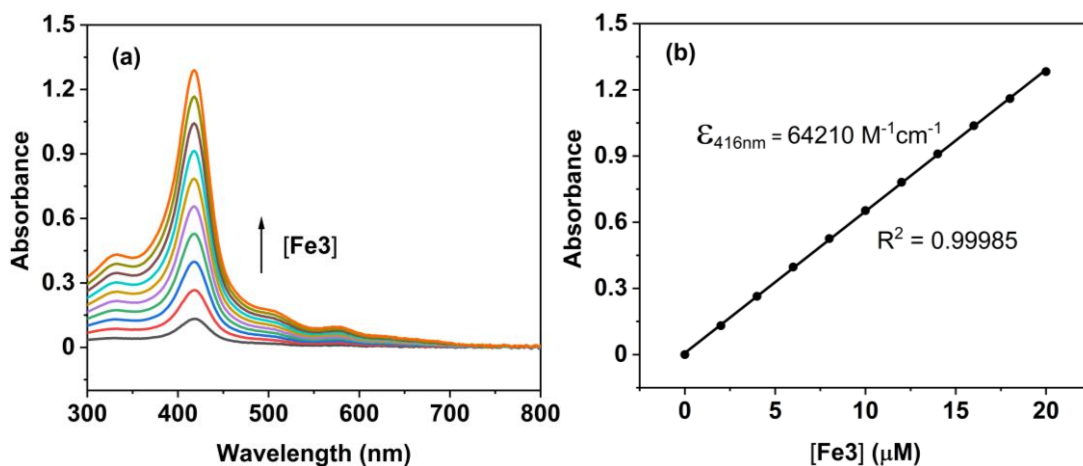

**Fig. S11** (a) UV-vis absorption spectra of **Fe3** in DMF at different concentrations. (b) Linear plots of absorbance at 416 nm.

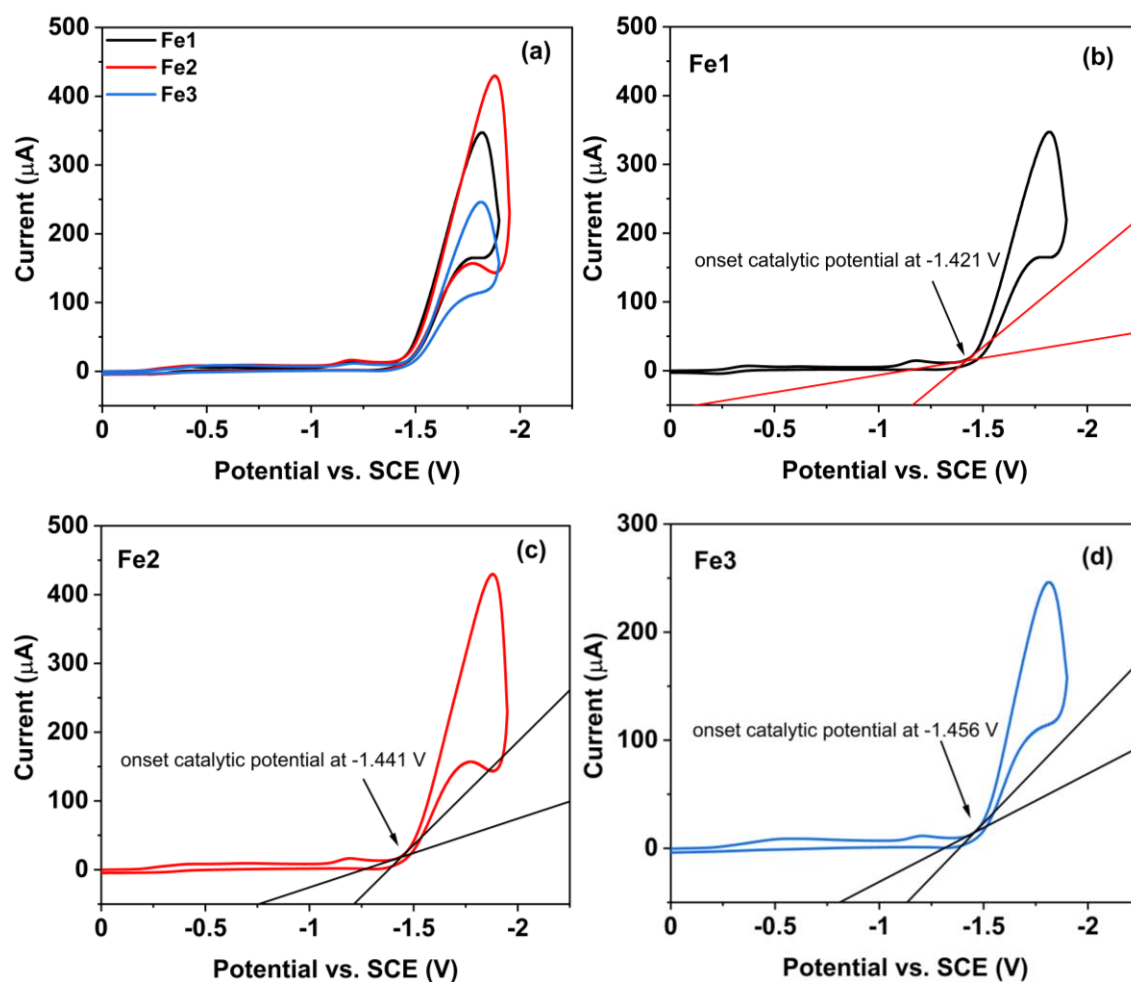

**Fig. S12** Cyclic voltammograms of 1.0 mM Fe1 (black), Fe2 (red) and Fe3 (blue) in 5 mL DMF containing 0.1 M TBAPF<sub>6</sub> under CO<sub>2</sub> (a), along with the onset of the catalytic potential (b-d).



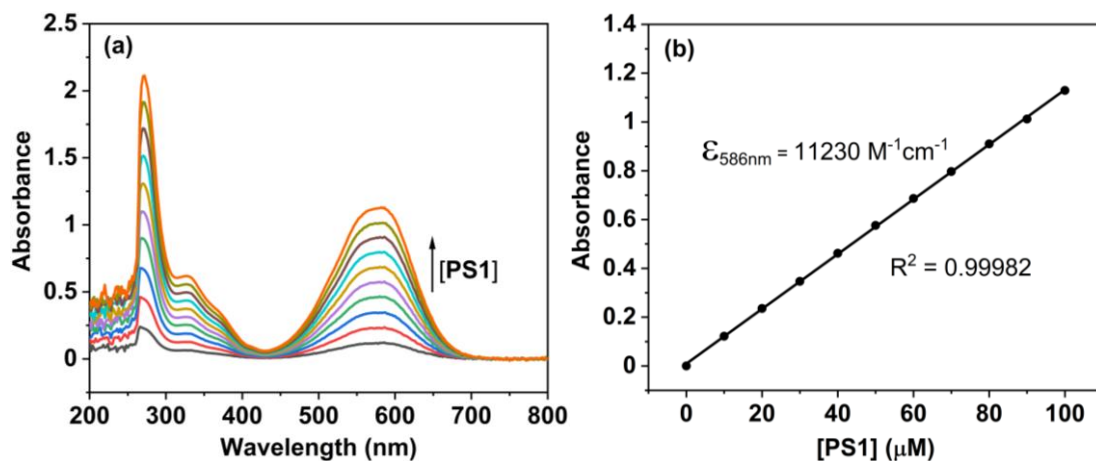

**Fig. S13** (a) UV-vis absorption spectra of PS1 in DMF at different concentrations. (b) Linear plots of absorbance at 586 nm.

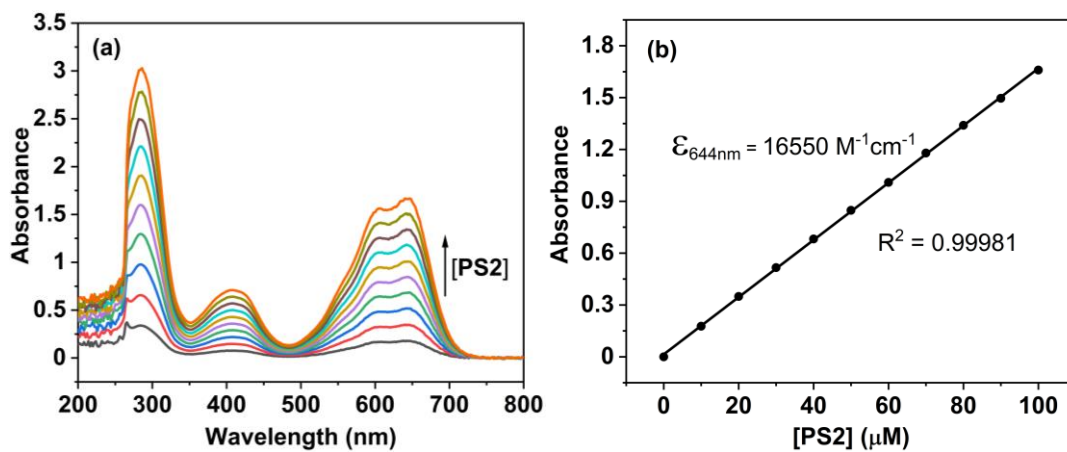

**Fig. S14** (a) UV-vis absorption spectra of PS2 in DMF at different concentrations. (b) Linear plots of absorbance at 644 nm.

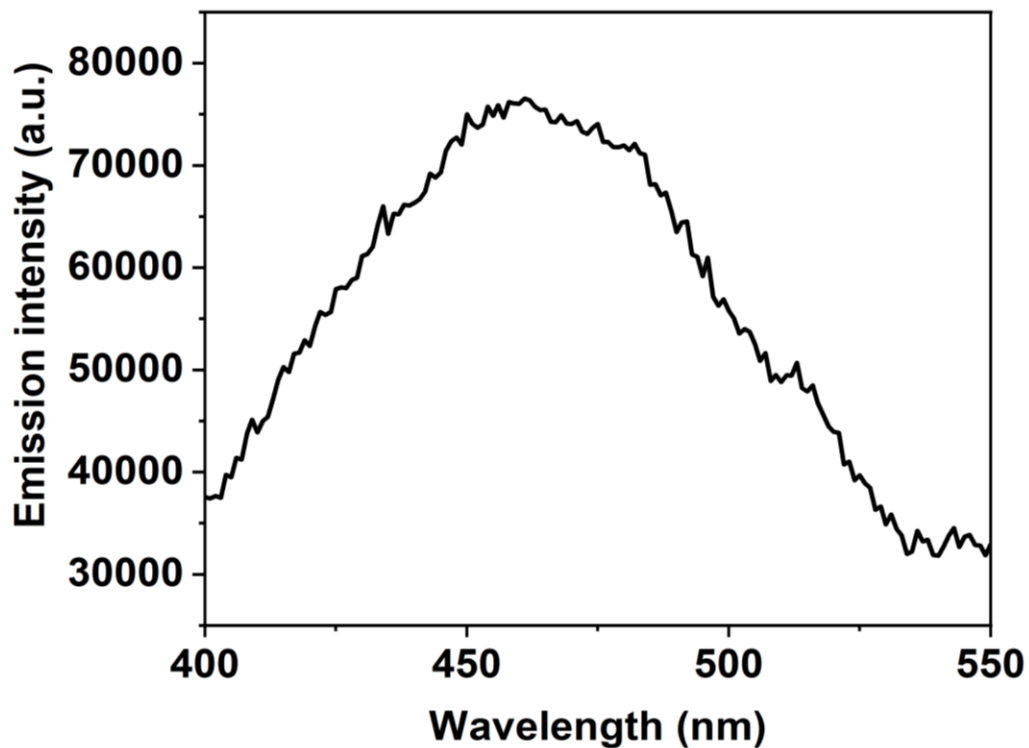

Fig. S15 Excitation spectra ( $\lambda_{em}$ : 600 nm) of PS1 at 298 K in DMF.

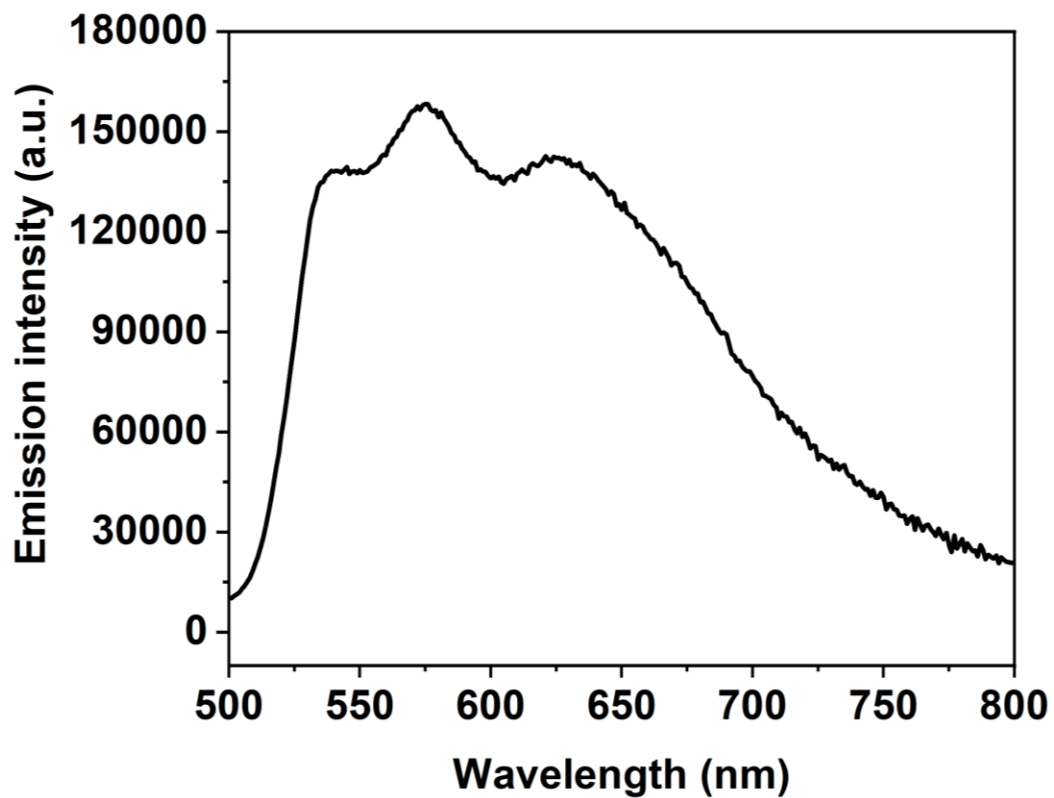

Fig. S16 Emission spectra ( $\lambda_{exc}$ : 460 nm) of PS1 at 298 K in DMF.

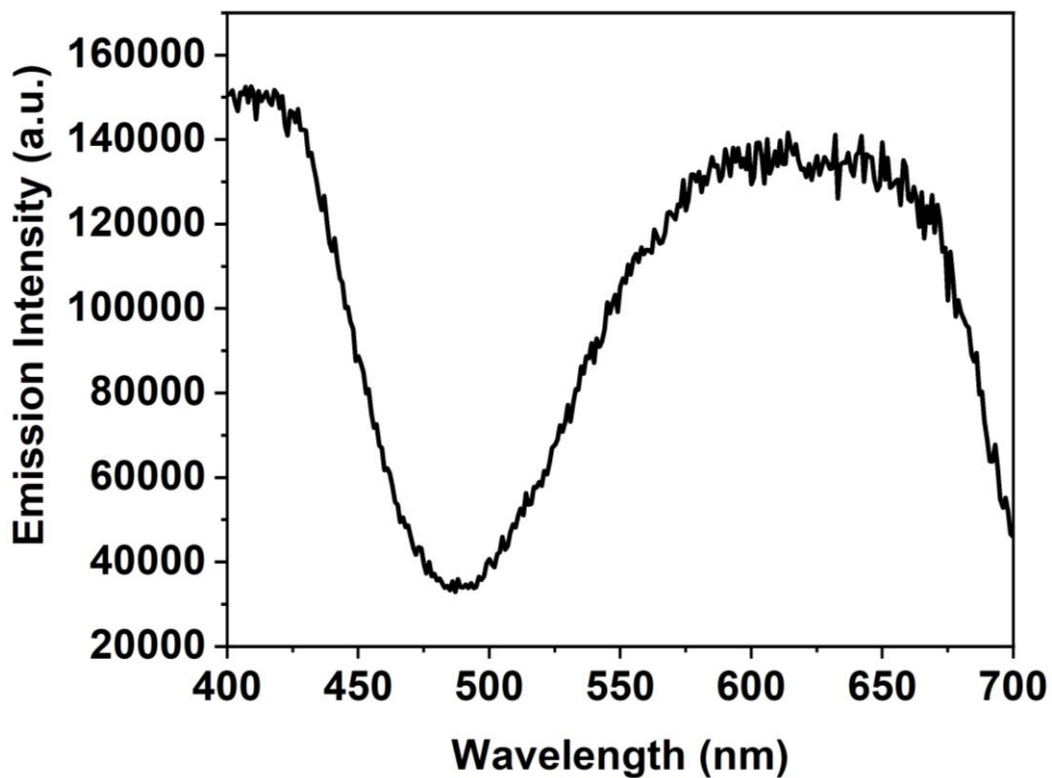

Fig. S17 Excitation spectra ( $\lambda_{em}$ : 750 nm) of PS2 at 298 K in DMF.

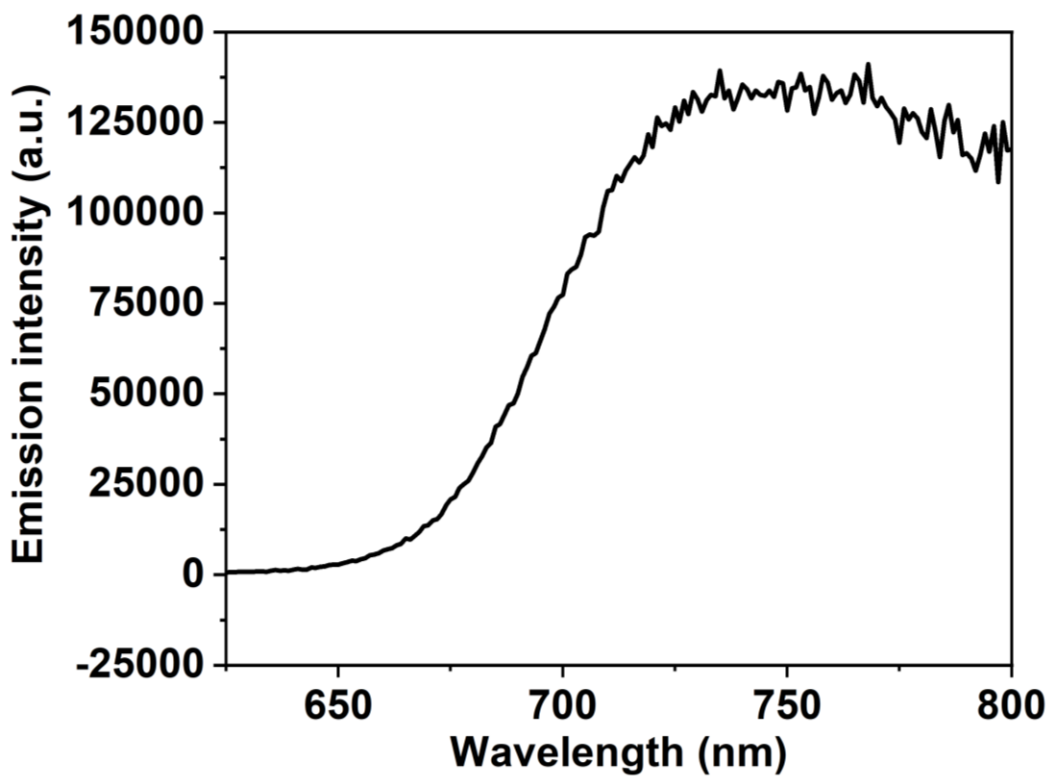

Fig. S18 Emission spectra ( $\lambda_{exc}$ : 600 nm) of PS2 at 298 K in DMF.

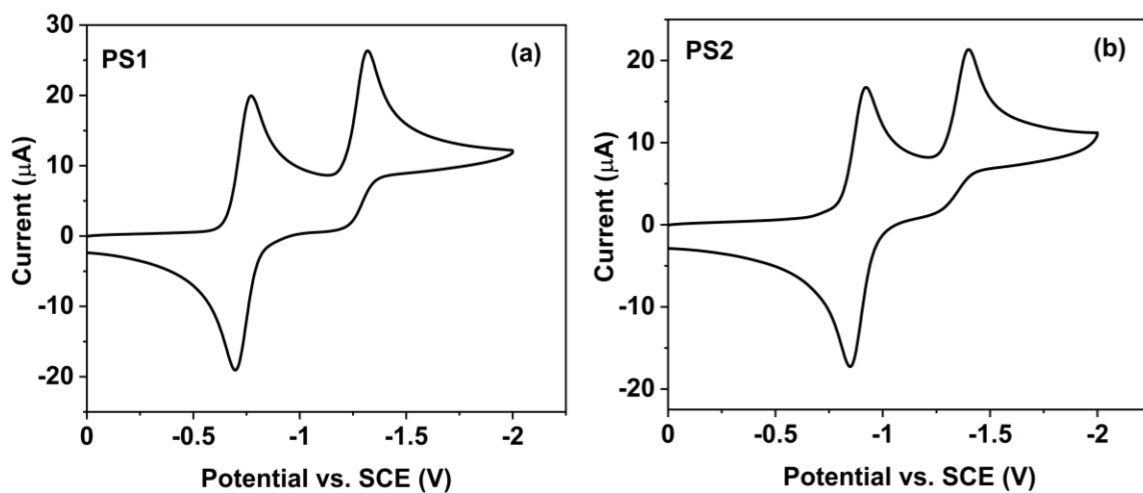

**Fig. S19** Cyclic voltammograms of 1.0 mM PS1 (a) and PS2 (b) in 5 mL DMF containing 0.1 M TBAPF<sub>6</sub> under N<sub>2</sub>.

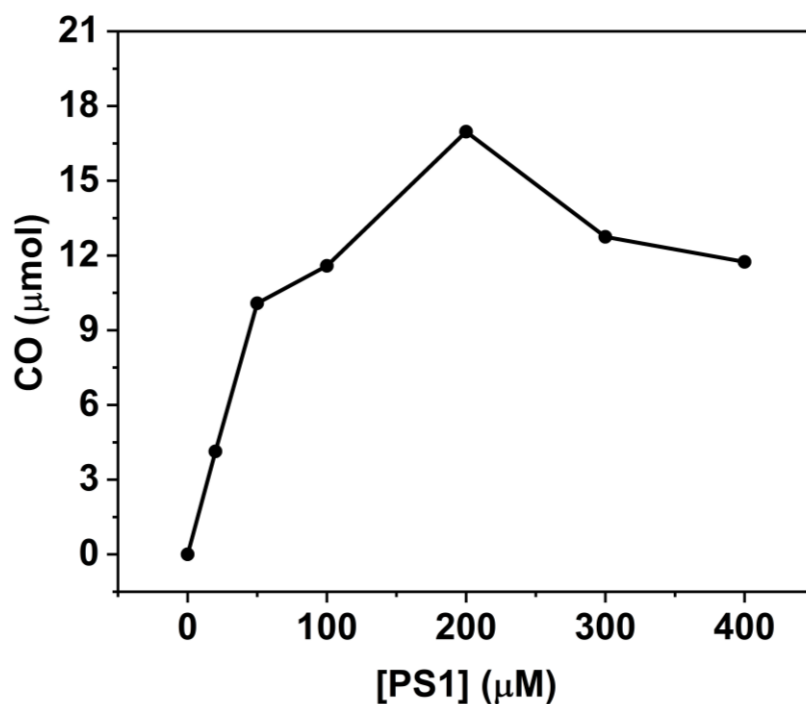

**Fig. S20** The amounts of CO of the photocatalytic CO<sub>2</sub> reduction experiments irradiated for 9 h in CO<sub>2</sub>-saturated DMF solution containing 1  $\mu\text{M}$  Fe1 and 10 mM BIH with varying amounts of [PS1].

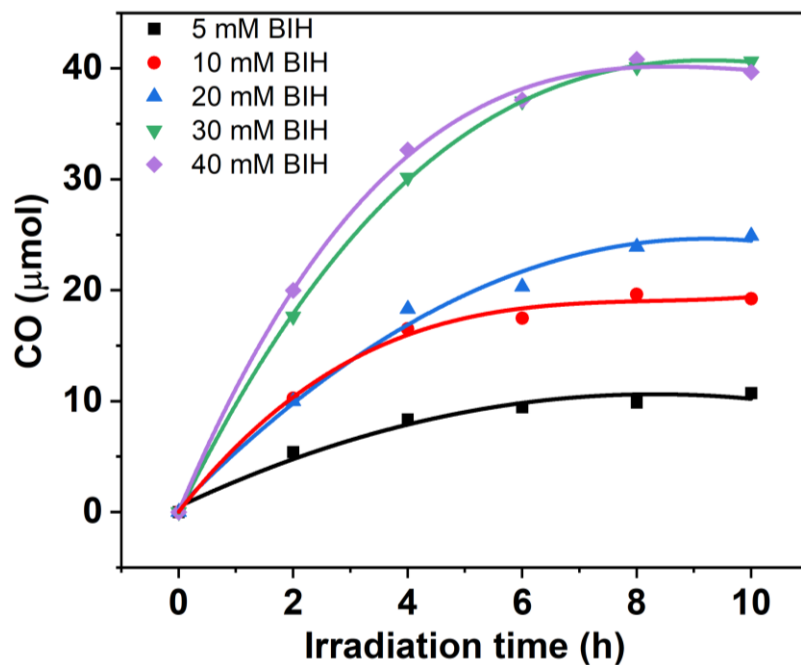

**Fig. S21** CO generation in CO<sub>2</sub>-saturated DMF solutions containing 1.0 μM Fe1 and 0.2 mM PS1 at different BIH concentrations.

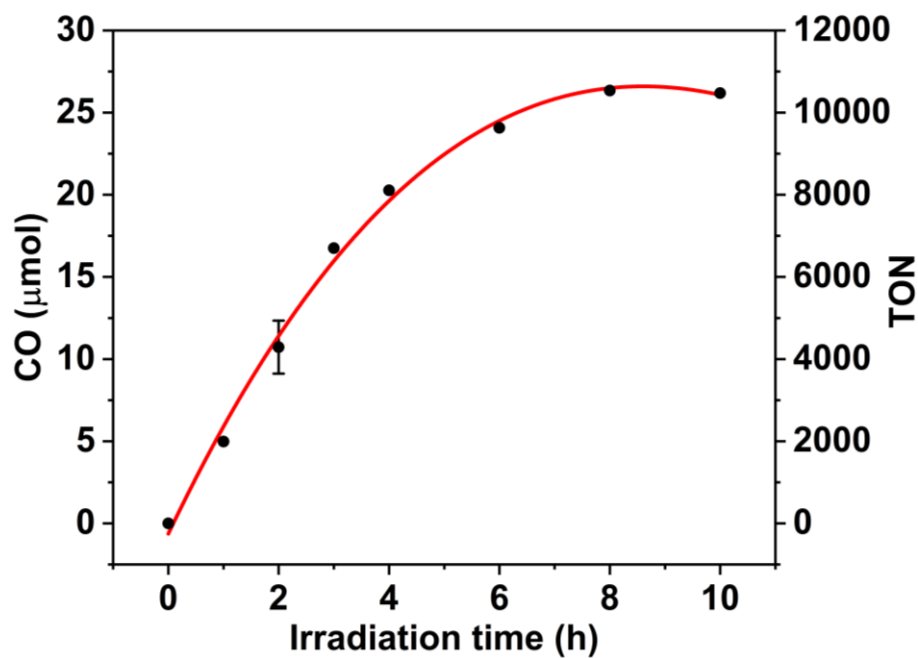

**Fig. S22** CO generation in CO<sub>2</sub>-saturated DMF solutions containing 0.5 μM Fe1, 0.2 mM PS1, and 30 mM BIH.

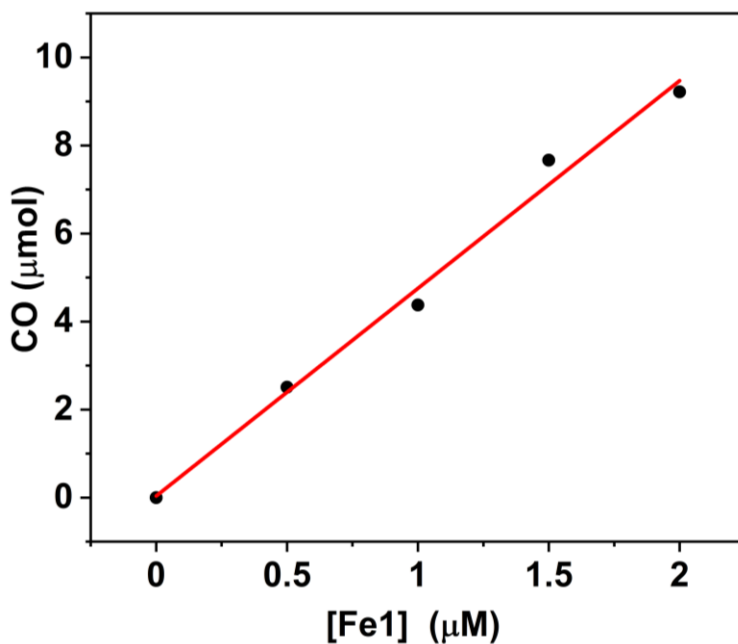

**Fig. S23** The amounts of CO of the photocatalytic CO<sub>2</sub> reduction experiments irradiated for 1 h in CO<sub>2</sub>-saturated DMF solution containing 200 μM **PS1** and 30 mM BIH with varying amounts of [**Fe1**].

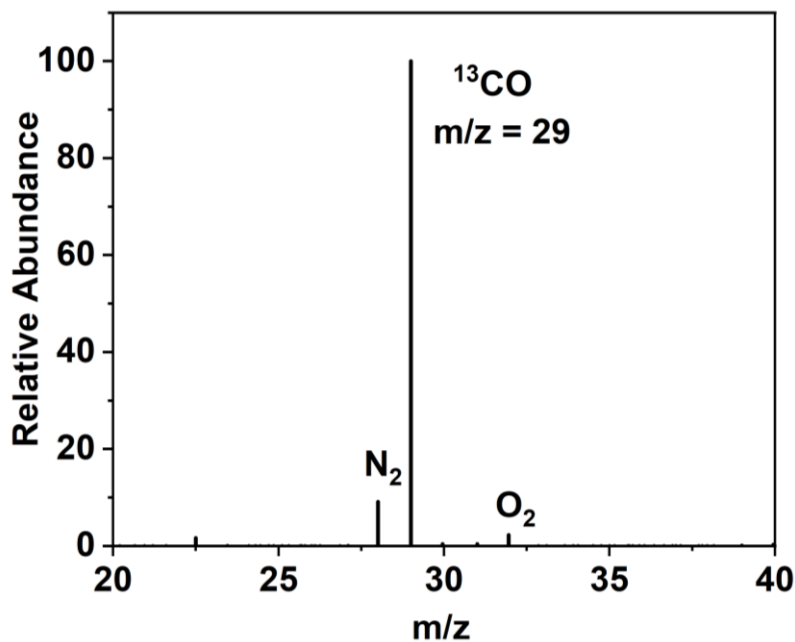

**Fig. S24** GC-MS analyses of photocatalytic experiments under <sup>13</sup>CO<sub>2</sub>-saturated DMF solutions containing: 30 mM BIH, 1.0 μM **Fe1** and 0.2 mM **PS1**. The small peaks (m/z = 28 and 32) in a ratio of 4:1 are N<sub>2</sub> and O<sub>2</sub> from the air introduced during sample injections.

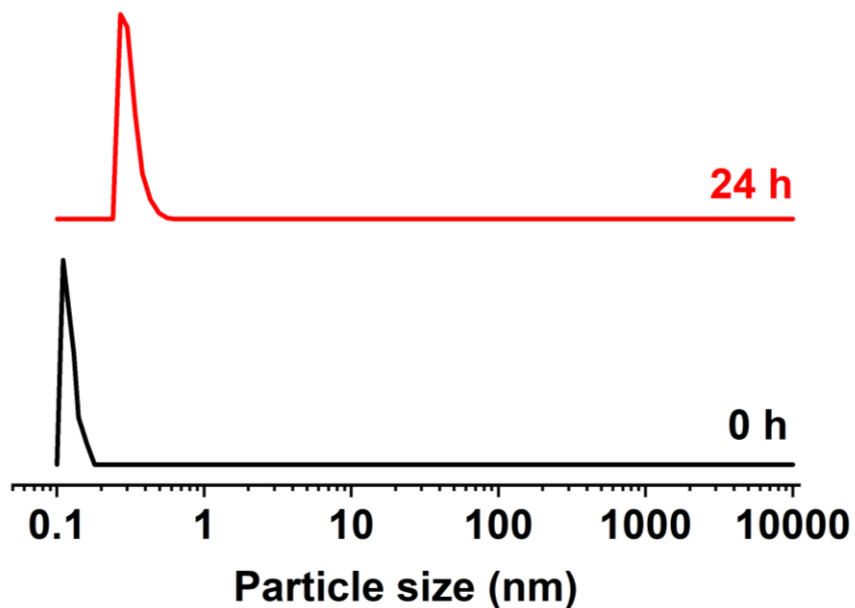

**Fig. S25** Particle size distribution of a CO<sub>2</sub>-saturated DMF solution containing 0.2 mM PS1, 1 μM Fe1 and 30 mM BIH determined by dynamic light scattering (DLS) measurement before and after irradiation.

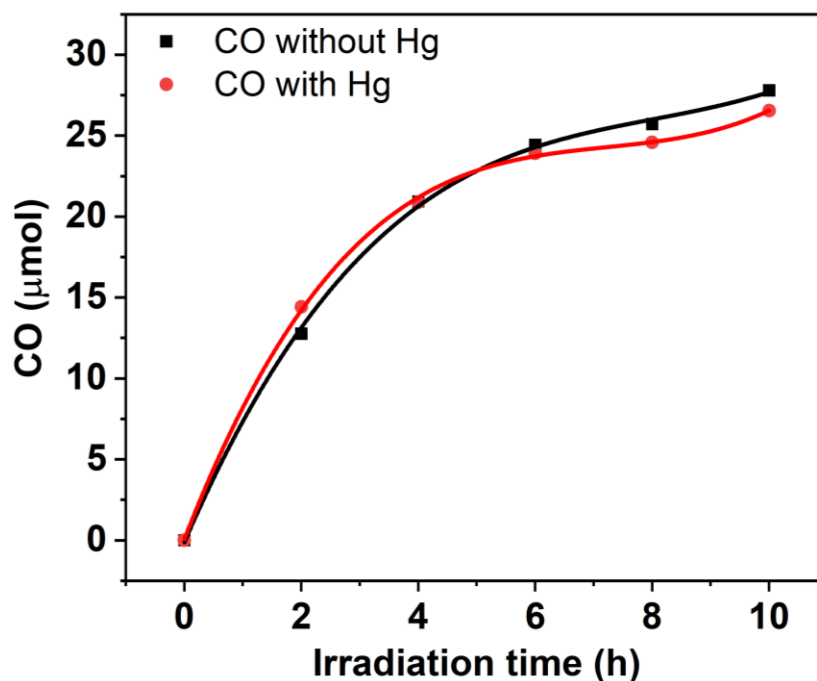

**Fig. S26** CO generation in CO<sub>2</sub>-saturated DMF solutions containing 10 mM BIH, 1.0 μM Fe1, and 0.2 mM PS1 in the presence and absence of Hg<sup>0</sup> (~0.02 mL) under blue LED.

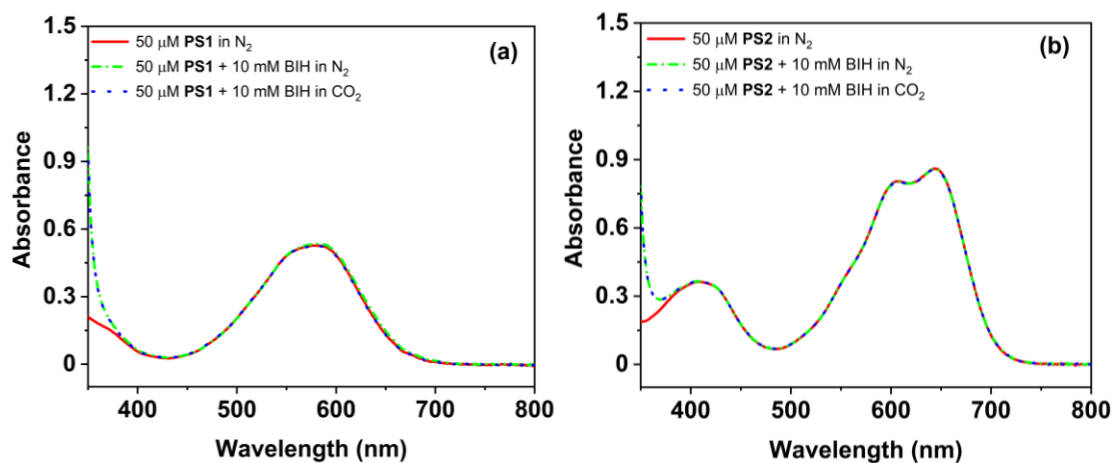

**Fig. S27** UV-vis absorption spectra of 50  $\mu\text{M}$  PS1 (a) and PS2 (b), with or without the presence of 10 mM BIH in DMF under N<sub>2</sub> and CO<sub>2</sub> at 298 K.

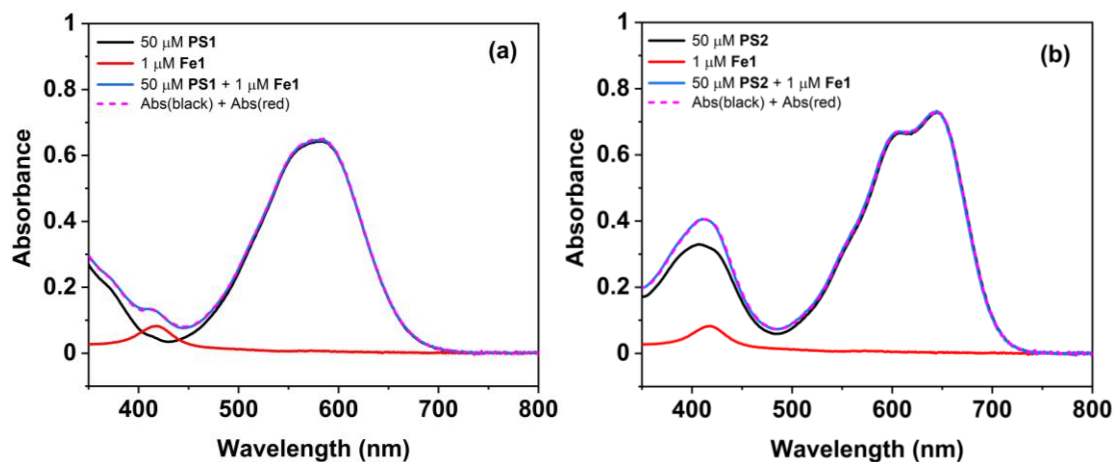

**Fig. S28** UV-vis absorption spectra of 50  $\mu\text{M}$  photosensitizer, 1  $\mu\text{M}$  Fe1, and a mixture of 50  $\mu\text{M}$  photosensitizer and 1  $\mu\text{M}$  Fe1 in DMF under CO<sub>2</sub> at 298 K.



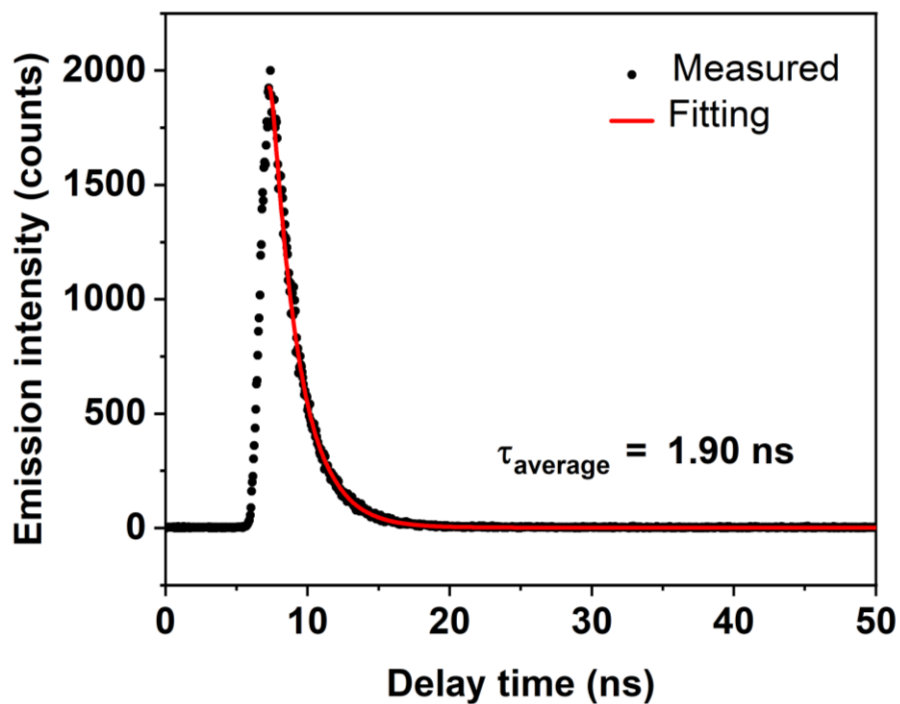

**Fig. S29** Emission decay of 50  $\mu\text{M}$  PS1 in DMF at 298 K. The decay curve was fitted with a double exponential equation ( $I(\tau) = A_1 \exp(-\tau/\tau_1) + A_2 \exp(-\tau/\tau_2)$ ).

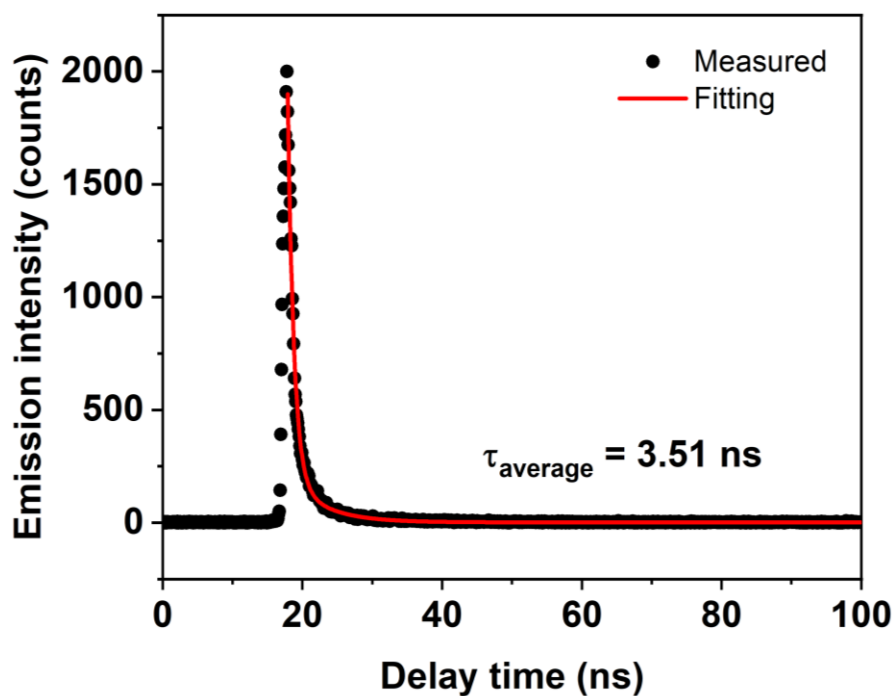

**Fig. S30** Emission decay of 50  $\mu\text{M}$  PS2 in DMF at 298 K. The decay curve was fitted with a double exponential equation ( $I(\tau) = A_1 \exp(-\tau/\tau_1) + A_2 \exp(-\tau/\tau_2)$ ).

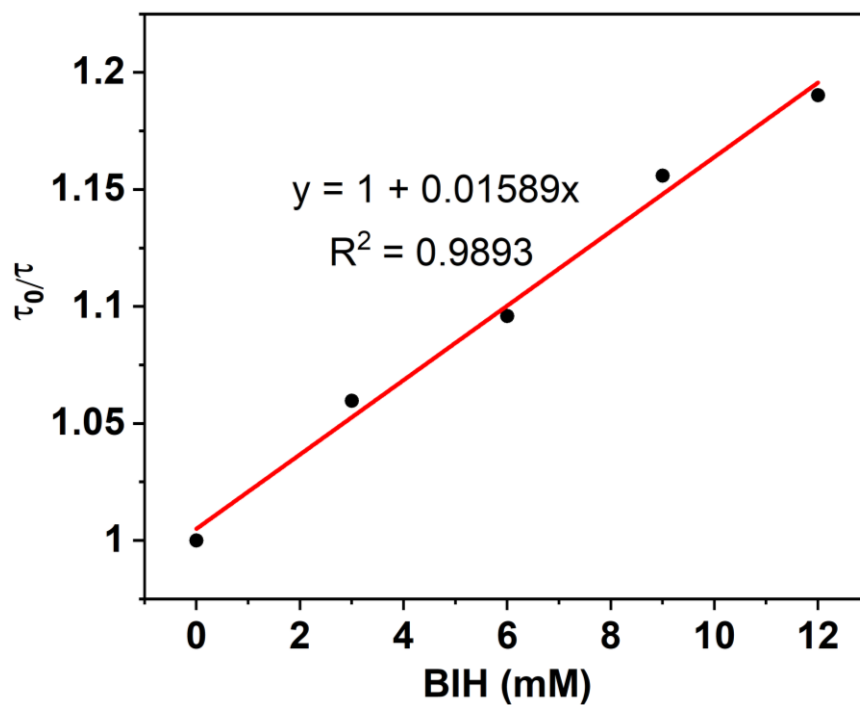

**Fig. S31** Stern-Volmer plots of fluorescence lifetime quenching of 50  $\mu\text{M}$  PS1 in DMF under  $\text{N}_2$ .

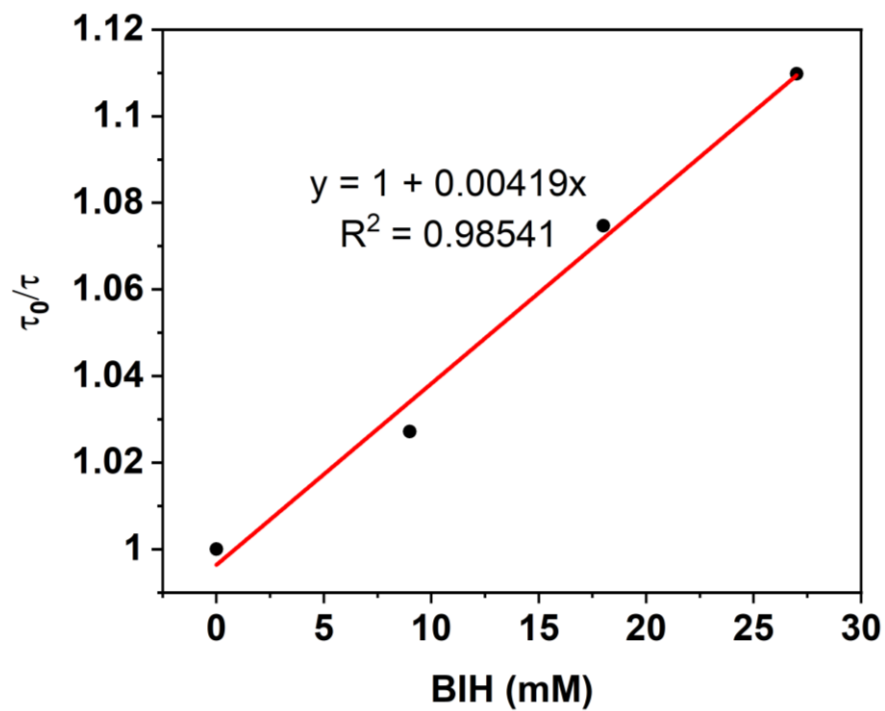

**Fig. S32** Stern-Volmer plots of fluorescence lifetime quenching of 50  $\mu\text{M}$  PS2 in DMF under  $\text{N}_2$ .

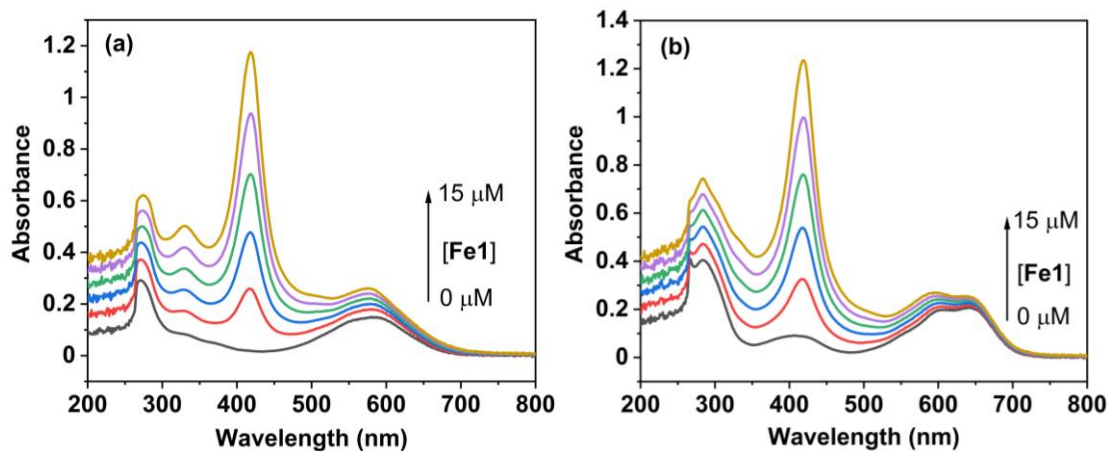

**Fig. S33** UV-vis absorption spectra of 20  $\mu\text{M}$  PS1 (a) and PS2 (b) in DMF at 298 K with addition of varying amounts of Fe1.

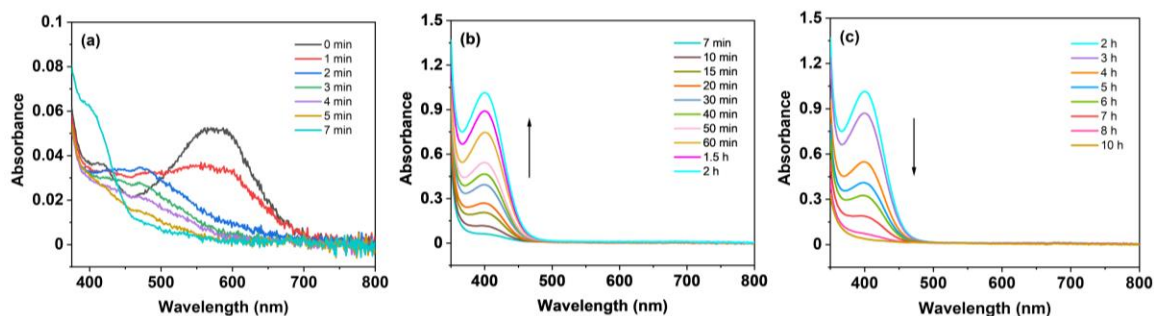

**Fig. S34** UV-vis absorption spectra of systems containing 10 mM BIH, 1  $\mu\text{M}$  Fe1 and 20  $\mu\text{M}$  PS1 in  $\text{CO}_2$ -saturated DMF at 298 K under irradiation with a blue LED ( $\lambda = 450 \text{ nm}$ ). Irradiation time ranging from 0 to 7 min (a), from 7 min to 2 h (b), and from 2 to 10 h (c).

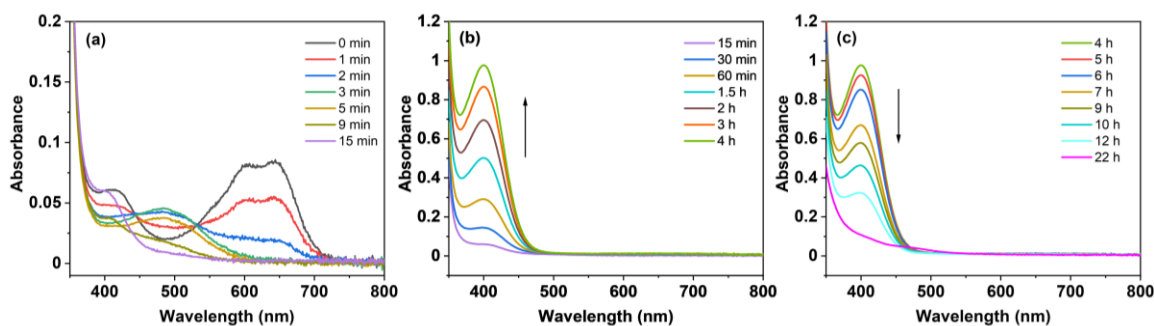

**Fig. S35** UV-vis absorption spectra of systems containing 10 mM BIH, 1  $\mu\text{M}$  Fe1 and 20  $\mu\text{M}$  PS2 in  $\text{CO}_2$ -saturated DMF at 298 K under irradiation with a blue LED ( $\lambda = 450 \text{ nm}$ ). Irradiation time ranging from 0 to 15 min (a), from 15 min to 4 h (b), and from 4 to 22 h (c).

**Table S1.** Electrochemical properties of catalyst under N<sub>2</sub> and CO<sub>2</sub> atmospheres.

| Catalyst | Fe <sup>III/II</sup><br>(V vs. SCE) <sup>[a]</sup> | Fe <sup>II/I</sup><br>(V vs. SCE) <sup>[a]</sup> | Fe <sup>I/0</sup><br>(V vs. SCE) <sup>[a]</sup> | Onset catalytic<br>potential (V vs. SCE) <sup>[b]</sup> |
|----------|----------------------------------------------------|--------------------------------------------------|-------------------------------------------------|---------------------------------------------------------|
| Fe1      | -0.29                                              | -1.17                                            | -1.58                                           | -1.42                                                   |
| Fe2      | -0.32                                              | -1.16                                            | -1.55                                           | -1.44                                                   |
| Fe3      | -0.35                                              | -1.17                                            | -1.60                                           | -1.46                                                   |

<sup>[a]</sup>Under N<sub>2</sub> atmosphere; <sup>[b]</sup>Under CO<sub>2</sub> atmosphere.

**Table S2.** Photophysical parameters of PS1 and PS2 at 298 K in DMF solutions.

| Photosensitizer | $\lambda_{\max}$ abs/nm ( $\epsilon$ M <sup>-1</sup> cm <sup>-1</sup> ) | E <sub>red</sub> (V vs. SCE) | $\tau_0$ (ns) <sup>[a]</sup> | $k_q$ (M <sup>-1</sup> s <sup>-1</sup> ) |
|-----------------|-------------------------------------------------------------------------|------------------------------|------------------------------|------------------------------------------|
| PS1             | 586 (11230)                                                             | -0.733, -1.28                | 1.90                         | $8.37 \times 10^9$                       |
| PS2             | 644 (16550)                                                             | -0.885, -1.35                | 3.51                         | $1.19 \times 10^9$                       |

<sup>[a]</sup>50  $\mu$ M photosensitizer, a picosecond pulsed diode laser ( $\lambda = 472$  nm) was used as the excitation source.

**Table S3** Control experiments for photocatalytic CO<sub>2</sub> reduction for 10 h<sup>[a]</sup>

| Entry | Catalyst   | Photosensitizer | Electron donor | CO (μmol) | TON <sub>CO</sub> | Sel <sub>CO</sub> |
|-------|------------|-----------------|----------------|-----------|-------------------|-------------------|
| 1     | <b>Fe1</b> | <b>PS1</b>      | BIH            | 50.3      | 10052             | 100               |
| 2     | <b>Fe1</b> | <b>PS1</b>      | BIH            | 26.2      | 10476             | 100               |
| 3     | <b>Fe2</b> | <b>PS1</b>      | BIH            | 25.6      | 5115              | 100               |
| 4     | <b>Fe3</b> | <b>PS1</b>      | BIH            | 21.5      | 4305              | 100               |
| 5     | <b>Fe1</b> | <b>PS2</b>      | BIH            | 25.6      | 5112              | 100               |
| 6     | <b>Fe2</b> | <b>PS2</b>      | BIH            | 17.6      | 3519              | 100               |
| 7     | <b>Fe3</b> | <b>PS2</b>      | BIH            | 16.6      | 3330              | 100               |
| 8     | <b>Fe1</b> | <b>PS1</b>      | BIH            | 0         | 0                 | N/A               |
| 9     | <b>Fe1</b> | <b>PS1</b>      | BIH            | 0         | 0                 | N/A               |
| 10    | <b>Fe1</b> | <b>PS1</b>      | -              | 0         | 0                 | N/A               |
| 11    | -          | <b>PS1</b>      | BIH            | 0         | 0                 | N/A               |
| 12    | <b>Fe1</b> | -               | BIH            | 0         | 0                 | N/A               |

<sup>[a]</sup>In a typical photocatalytic experiment, a solution containing 1 μM catalyst, 0.2 mM photosensitizer and BIH (30 mM) was irradiated using blue LED ( $\lambda = 450$  nm) for 10 h under a CO<sub>2</sub> atmosphere. Entry 2: 0.5 μM **Fe1**, Entry 8: under N<sub>2</sub>, Entry 9: in dark, Entry 10: without BIH, Entry 11: without catalyst, Entry 12: without photosensitizer.

**Table S4.** The performance of photocatalytic CO<sub>2</sub> reduction with porphyrin complexes in noble-metal-free systems in the literature

| Photosensitizer                                 | Catalyst                  | Solvent                               | Electron donor | TON <sub>CO</sub> | TON <sub>H<sub>2</sub></sub> | Φ <sub>CO</sub> (%)  | Sel <sub>CO</sub> (%) <sup>a</sup> | Light source                           | Reference        |
|-------------------------------------------------|---------------------------|---------------------------------------|----------------|-------------------|------------------------------|----------------------|------------------------------------|----------------------------------------|------------------|
| PS1                                             | Fe1 (0.5 μM)              | DMF                                   | BIH            | 10476             | 0                            | 0.95                 | 100                                | blue LEDs<br>(λ = 450 nm)              | <b>This work</b> |
| PS1                                             | Fe2 (1 μM)                | DMF                                   | BIH            | 5115              | 0                            | 0.63                 | 100                                |                                        |                  |
| PS1                                             | Fe3(1 μM)                 | DMF                                   | BIH            | 4305              | 0                            | 0.43                 | 100                                |                                        |                  |
| 1-amino-2-bromo-4-hydroxy-9,10-anthraquinone    | Fe2 (0.6 μM)              | DMF                                   | BIH            | 21616             | trace                        | 11.1                 | >99                                | White LEDs<br>(λ > 400 nm)             | 4                |
| CuPP                                            | Fe2 (0.2 μM)              | DMF                                   | BIH            | 16109             | 843                          | 6.0                  | 95                                 | White LEDs<br>(λ > 400 nm)             | 5                |
| 9-CNA                                           | Fe2 (2 μM)                | MeCN                                  | TEA            | 60                | 0                            | 8 × 10 <sup>-4</sup> | 100                                | Xe lamp (λ > 400 nm)                   | 6                |
| Non-sensitized                                  | Fe- <i>p</i> -TMA (2 μM)  | MeCN                                  | BIH            | 101               | 0                            | -                    | 100                                | solar simulator, 1 sun<br>(λ > 420 nm) | 7                |
| Non-sensitized                                  | Fe2 (10 μM)               | MeCN                                  | TEA            | 30                | 10                           | -                    | 75                                 | Xe lamp (cut off IR and low UV)        | 8                |
| 3,7-di(4-biphenyl)-1-naphthalene-10-phenoxazine | Fe- <i>p</i> -TMA (10 μM) | DMF                                   | TEA            | 140               | 23                           | -                    | 73                                 | solar simulator, 1 sun<br>(λ > 435 nm) | 9                |
| Purpurin                                        | Fe- <i>p</i> -TMA (2 μM)  | MeCN/H <sub>2</sub> O<br>(1:9, v/v)   | TEA            | 60                | 3                            | -                    | 95                                 | solar simulator, 1 sun<br>(λ > 420 nm) | 10               |
| CuPS                                            | Co(pTMPyP) (5 μM)         | 0.1 M<br>NaHCO <sub>3</sub><br>buffer | AscHNa         | 2680              | 820                          | 1.6                  | 77                                 | Xe lamp<br>(800 > λ > 400 nm)          | 11               |

**Table S4** (continued)

| Photosensitizer | Catalyst          | Solvent                         | Electron donor | TON <sub>CO</sub> | TON <sub>H<sub>2</sub></sub> | Φ <sub>CO</sub> (%) | Sel <sub>CO</sub> (%) <sup>a</sup> | Light source               | Reference |
|-----------------|-------------------|---------------------------------|----------------|-------------------|------------------------------|---------------------|------------------------------------|----------------------------|-----------|
| CuPS            | Co(oTMPyP) (5 μM) | 0.1 M NaHCO <sub>3</sub> buffer | AscHNa         | 4000              | 460                          | 5.7                 | 90                                 | Xe lamp (800 > λ > 400 nm) | 12        |
| p-terphenyl     | CoPP (50 μM)      | MeCN                            | TEA            | 62                | -                            | -                   | 66                                 | Xe lamp (λ < 300 nm)       | 13        |
| p-terphenyl     | FePP (50 μM)      | MeCN                            | TEA            | 42                | -                            | -                   | 38                                 |                            |           |

## References

1. X.-Q. Zhu, M.-T. Zhang, A. Yu, C.-H. Wang and J.-P. Cheng, *J. Am. Chem. Soc.*, 2008, **130**, 2501-2516.
2. C. Costentin, S. Drouet, M. Robert and J.-M. Savéant, *Science*, 2012, **338**, 90-94.
3. M. Ming, H. Yuan, S. Yang, Z. Wei, Q. Lei, J. Lei and Z. Han, *J. Am. Chem. Soc.*, 2022, **144**, 19680-19684.
4. Q. Lei, H. Yuan, J. Du, M. Ming, S. Yang, Y. Chen, J. Lei and Z. Han, *Nat. Commun.*, 2023, **14**, 1087.
5. H. Yuan, B. Cheng, J. Lei, L. Jiang and Z. Han, *Nat. Commun.*, 2021, **12**, 1835.
6. J. Bonin, M. Robert and M. Routier, *J. Am. Chem. Soc.*, 2014, **136**, 16768-16771.
7. H. Rao, J. Bonin and M. Robert, *Chem. Commun.*, 2017, **53**, 2830-2833.
8. J. Bonin, M. Chaussemier, M. Robert and M. Routier, *ChemCatChem*, 2014, **6**, 3200-3207.
9. H. Rao, C.-H. Lim, J. Bonin, G. M. Miyake and M. Robert, *J. Am. Chem. Soc.*, 2018, **140**, 17830-17834.
10. H. Rao, J. Bonin and M. Robert, *ChemSusChem*, 2017, **10**, 4447-4450.
11. X. Zhang, M. Cibian, A. Call, K. Yamauchi and K. Sakai, *ACS Catal.*, 2019, **9**, 11263-11273.
12. X. Zhang, K. Yamauchi and K. Sakai, *ACS Catal.*, 2021, **11**, 10436-10449.
13. T. Dhanasekaran, J. Grodkowski, P. Neta, P. Hambright and E. Fujita, *J. Phys. Chem. A*, 1999, **103**, 7742-7748.
